# Supplementary material for: Structural and mechanistic analysis of a tripartite ATP-independent periplasmic TRAP transporter
Source: PubMed Central journal article supplement (PMC9352664; doi:10.1038/s41467-022-31907-y), 2022-08-04
Supplement: 41467_2022_31907_MOESM1_ESM.pdf [file 41467_2022_31907_MOESM1_ESM.pdf]

## Supplementary Information for:

### Structural and mechanistic analysis of a tripartite ATP-independent periplasmic TRAP transporter

Martin F. Peter<sup>1</sup>, Jan A. Ruland<sup>2</sup>, Peer Depping<sup>1,3</sup>, Niels Schneberger<sup>1</sup>, Emmanuele Severi<sup>4,5</sup>, Jonas Moecking<sup>1</sup>, Karl Gatterdam<sup>1</sup>, Sarah Tindall<sup>4</sup>, Alexandre Durand<sup>6</sup>, Veronika Heinz<sup>7</sup>, Jan-Peter Siebrasse<sup>2</sup>, Paul-Albert Koenig<sup>8</sup>, Matthias Geyer<sup>1</sup>, Christine Ziegler<sup>7</sup>, Ulrich Kubitscheck<sup>2</sup>, Gavin H. Thomas<sup>4</sup>, Gregor Hagelueken<sup>1,\*</sup>

<sup>1</sup> Institute of Structural Biology, University of Bonn, Venusberg-Campus 1, 53127 Bonn, Germany

<sup>2</sup> Institute for Physical und Theoretical Chemistry, University of Bonn, Wegelerstr. 12, 53127 Bonn, Germany

<sup>3</sup> Aston Centre for Membrane Proteins and Lipids Research, Aston St., B4 7ET, Birmingham, United Kingdom

<sup>4</sup> Department of Biology (Area 10), University of York, York YO10 5YW, United Kingdom

<sup>5</sup> Biosciences Institute, Newcastle University, Newcastle, NE2 4HH, United Kingdom

<sup>6</sup> Institut de Génétique et de Biologie Molecule et Cellulaire, 1 Rue Laurent Fries, 67404 Illkirch CEDEX, France

<sup>7</sup> Institute of Biophysics and Biophysical Chemistry, University of Regensburg, 95053 Regensburg, Germany

<sup>8</sup> Core Facility Nanobodies, University of Bonn, Venusberg-Campus 1, 53127 Bonn, Germany

\*Corresponding author email: [hagelueken@uni-bonn.de](mailto:hagelueken@uni-bonn.de)

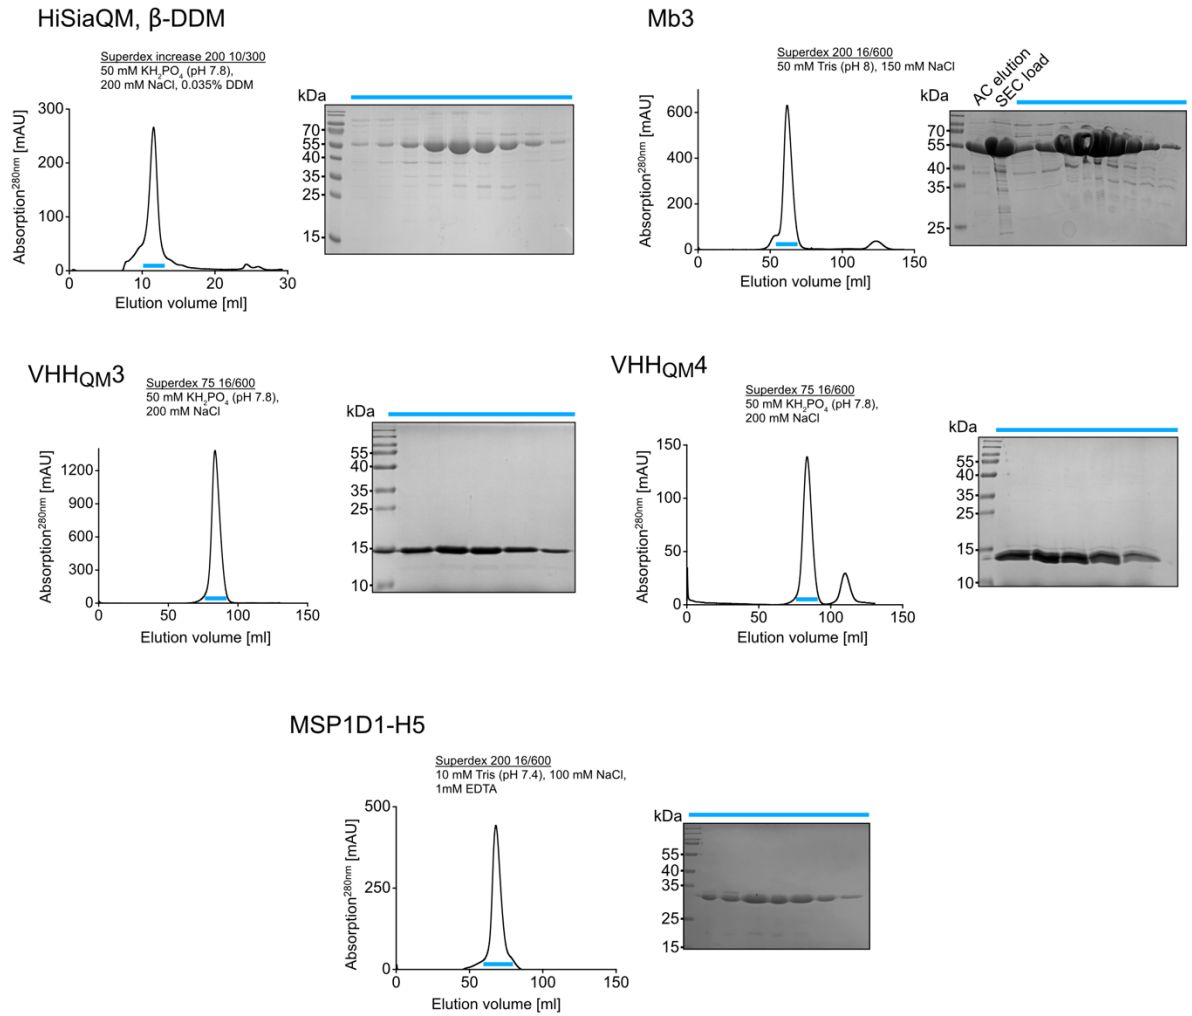

**Supplementary Fig. 1 | Quality of proteins used in this study.** A size-exclusion chromatography profile is shown for each protein. The buffers and SEC columns are given next to the chromatograms. The fractions highlighted in blue were analysed by SDS-PAGE, as shown on the right side of the corresponding SEC profile. The panels show representative examples of  $n \geq 3$  experiments. Source data are provided as a Source Data file.

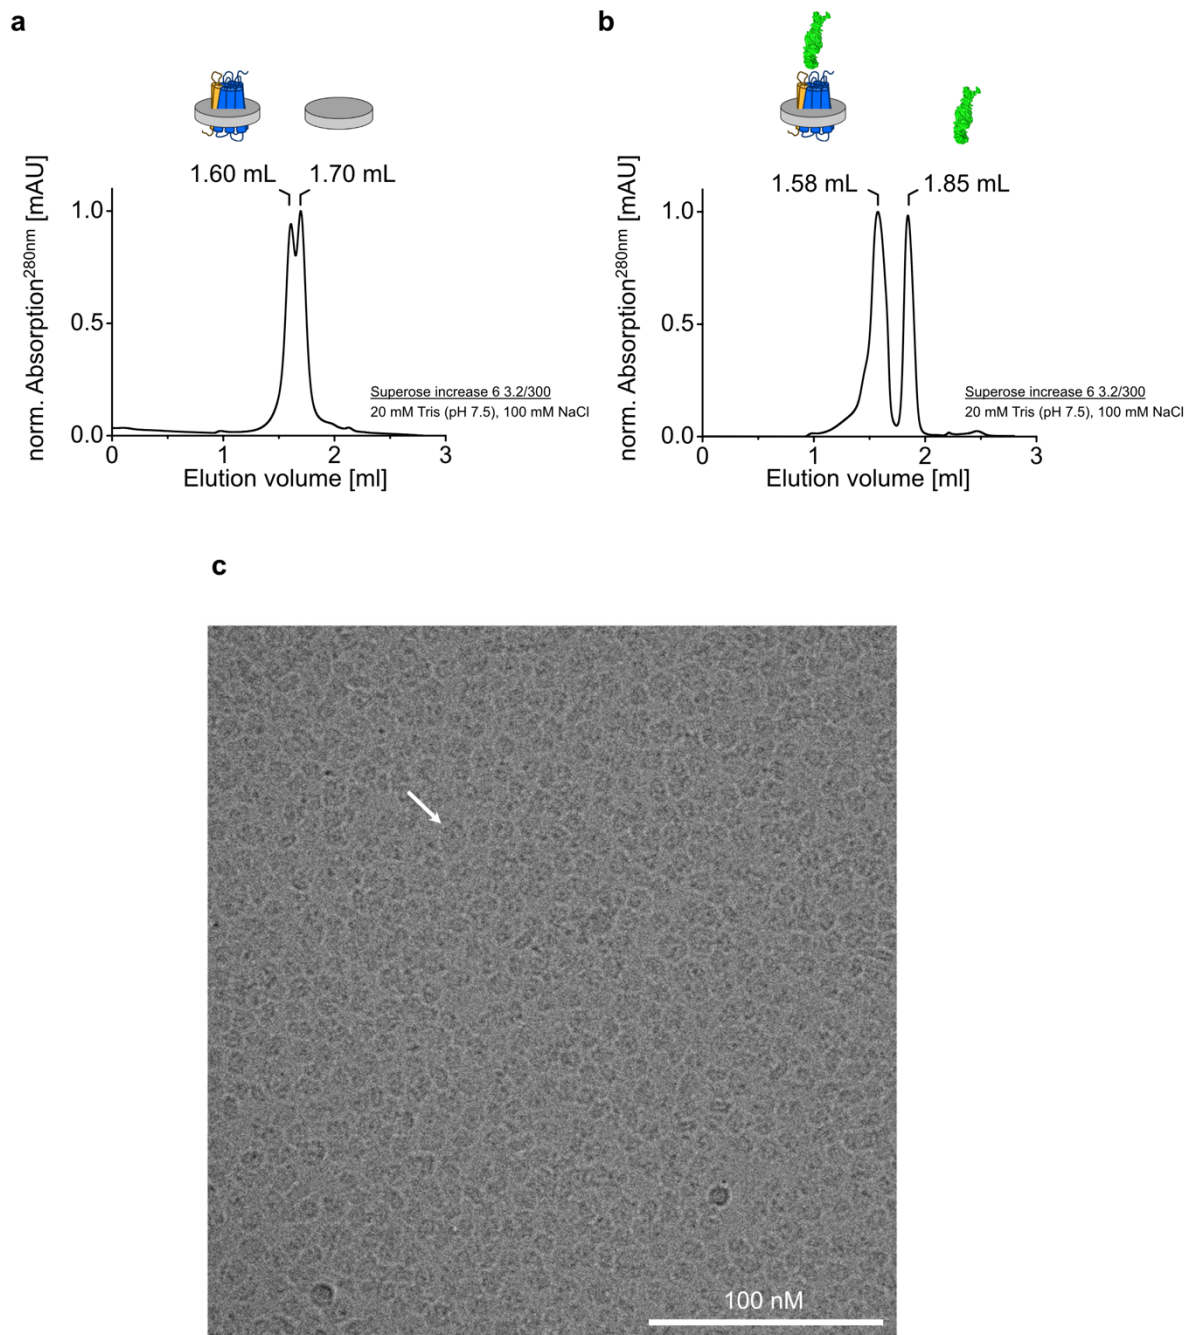

**Supplementary Fig. 2 | Cryo-EM sample preparation and raw micrograph of the HiSiaQM/Mb3 complex in MSP1D1-H5 nanodiscs. a**, Normalized SEC elution profile of the HiSiaQM-MSP1D1-H5 reconstitution mixture. **b**, Normalized SEC elution profile of the HiSiaQM-MSP1D1-H5 reconstitution mixture after Ni-NTA affinity chromatography pull-down via immobilized Mb3. **c**, The picture was recorded with a ThermoFisher Glacios microscope equipped with a K2 camera at 200 kV. The white arrow marks a representative nanodisc in top-view with Mb3 visible as a dark spot. The micrograph is a representative example of the n=5004 micrographs recorded of the sample.

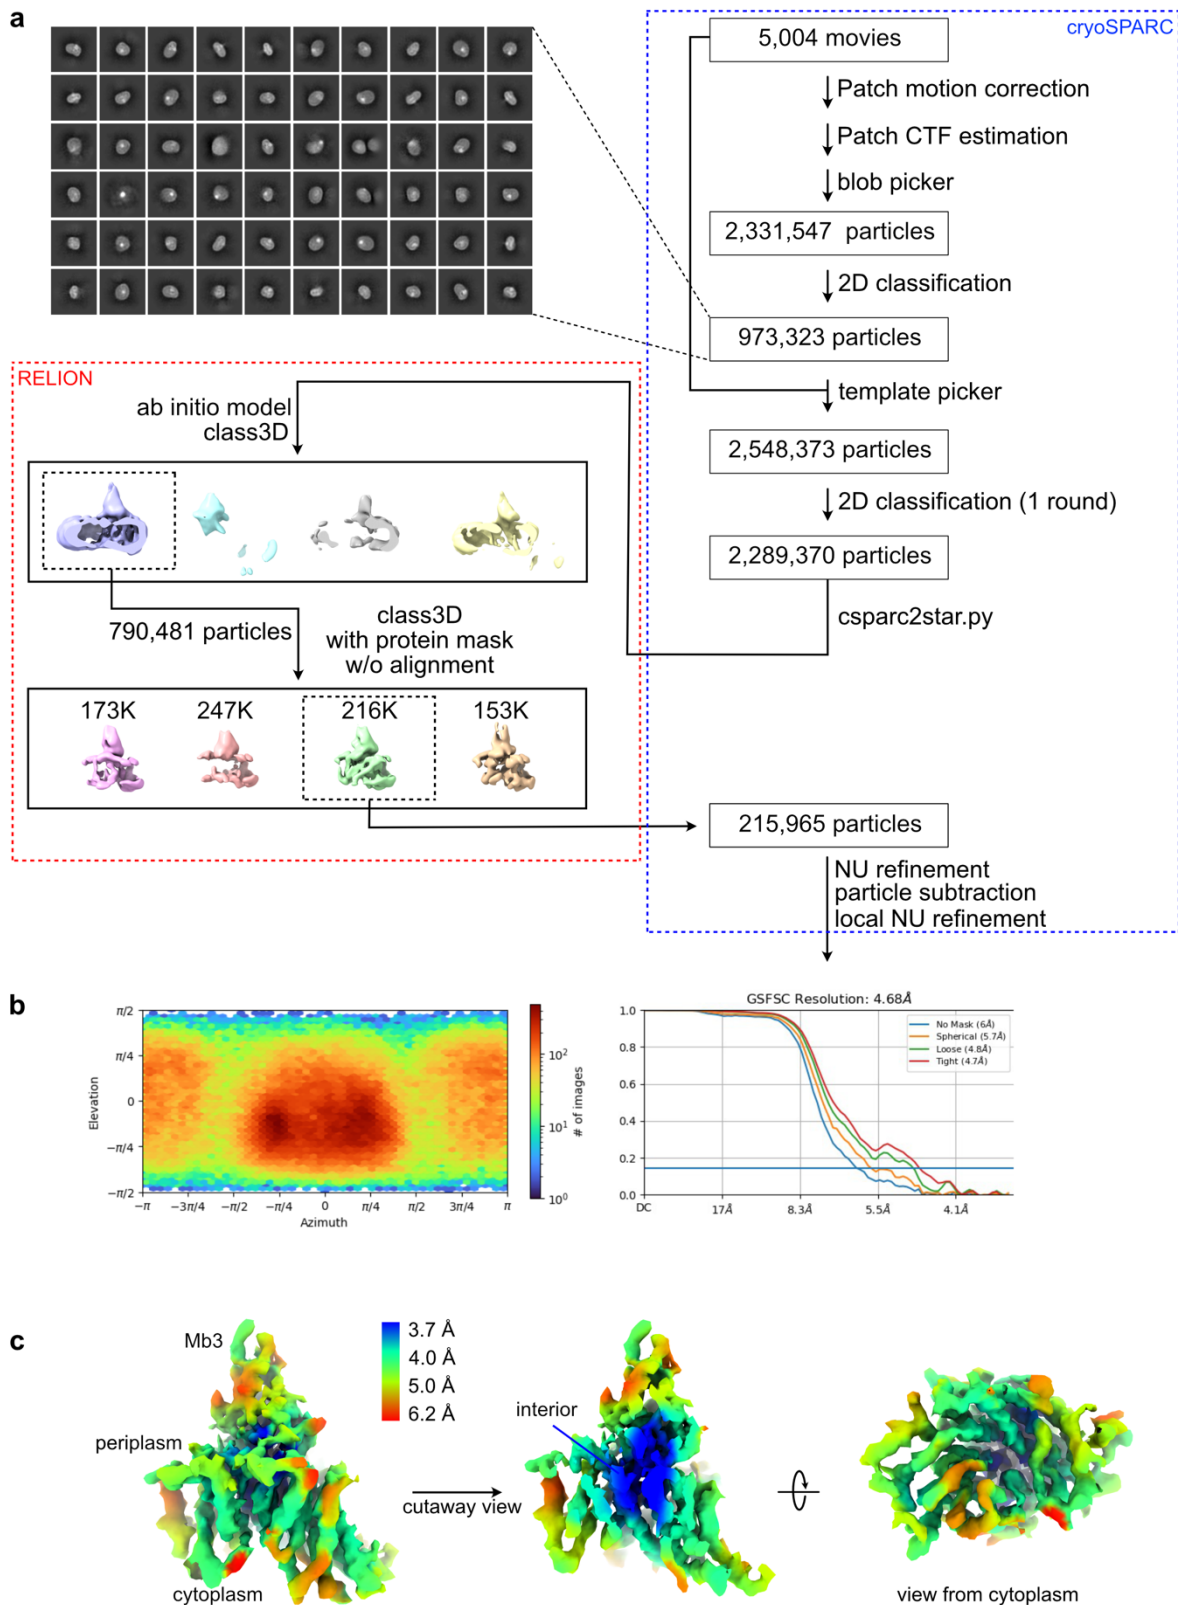

**Supplementary Fig. 3 | Cryo-EM processing workflow.** **a**, Workflow for the 3D reconstruction of HiSiaQM in lipid nanodiscs with Mb3 bound to the periplasmic side. Dashed blue and red boxes indicate which parts of the process were performed in cryoSPARC<sup>1</sup> or RELION<sup>2</sup>. **b**, Distribution of viewing angles and Gold-standard FSC curves for the final refinement step. **c**, Local resolution estimates calculated in cryoSPARC (0.143 cutoff).



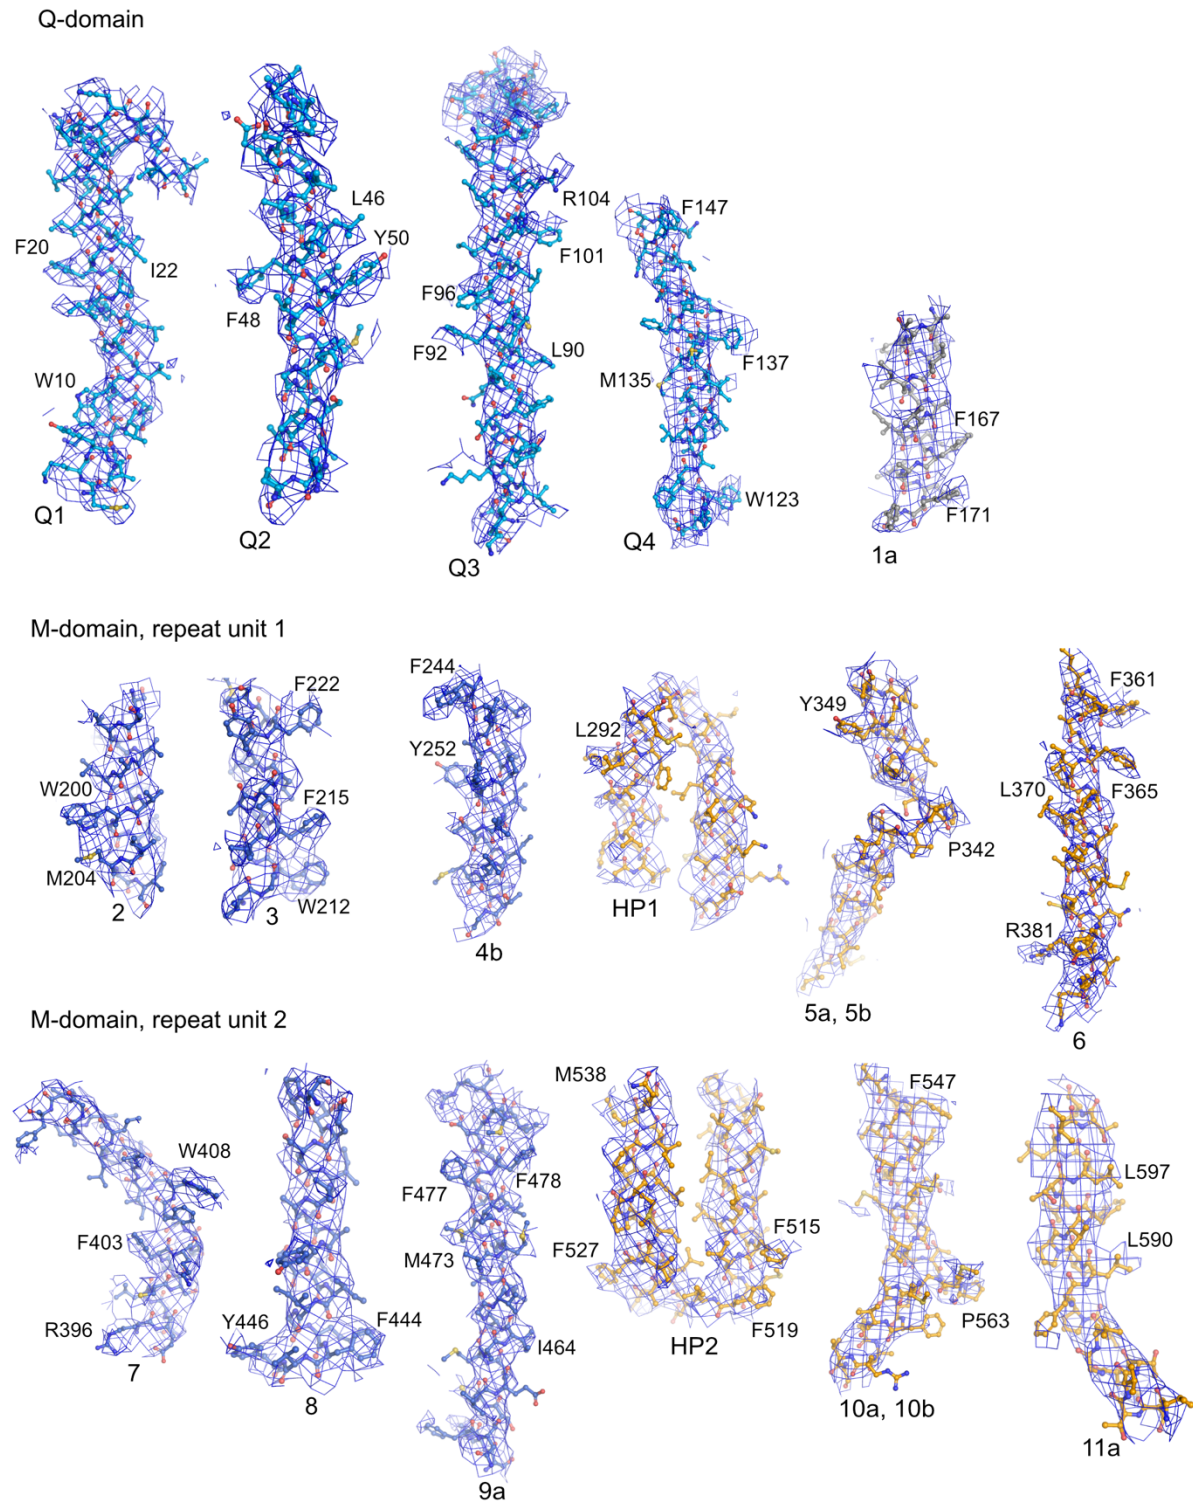

**Supplementary Fig. 4 | Fit of TM helices of HiSiaQM to the 3D reconstruction.** The transmembrane helices (number is given at the bottom of each helix, compare Figure 1) are shown as ball-and-stick models. The color code is defined in Figure 1. The blue mesh is the 3D reconstruction at a sigma level of 6.0. Selected residues are indicated.

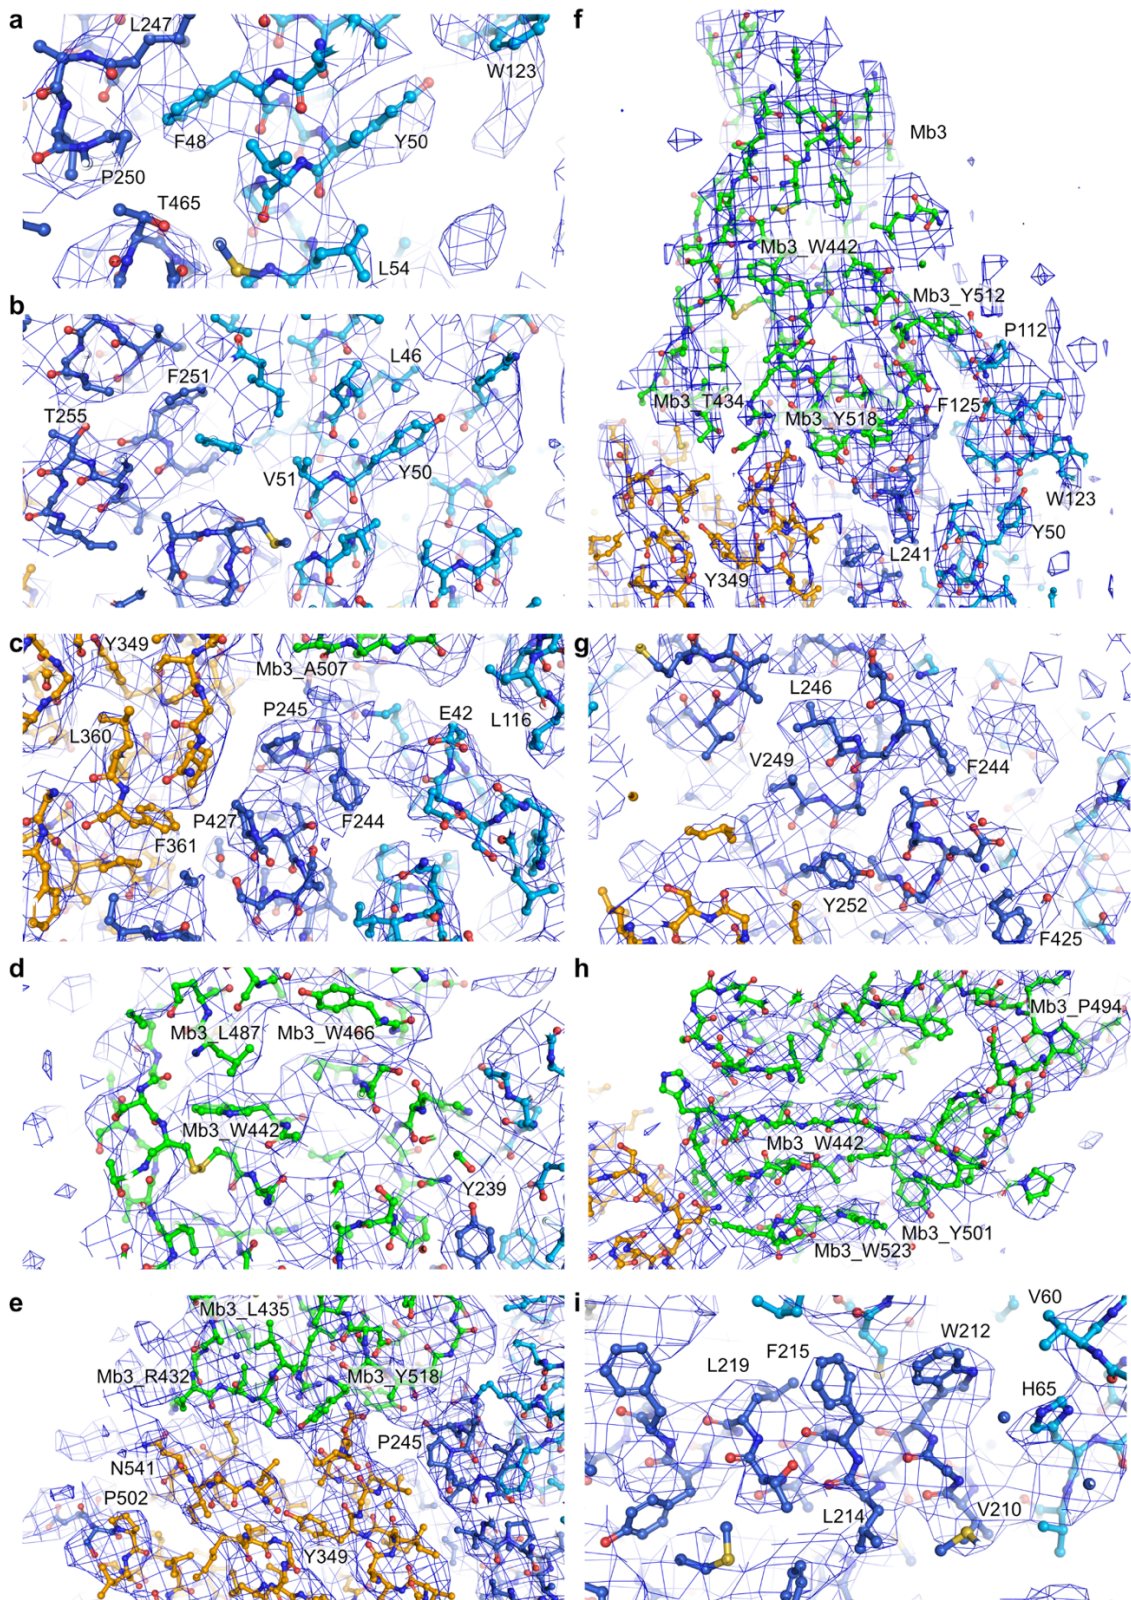

**Supplementary Fig. 5 | Fit of the HiSiaQM model to the 3D reconstruction.** The HiSiaQM model is shown in ball-and-stick representation. The color code is defined in Figure 1. The blue mesh is the 3D reconstruction at a sigma level of 6.0. Selected residues are indicated. **a)** Detail of the QM interface. **b)** Detail of the QM interface. **c)** Detail of the stator/elevator/VHH<sub>QM3</sub> interface. **d)** Core region of VHH<sub>QM3</sub>. **e, f)** Detail of the stator/elevator/VHH<sub>QM3</sub> interface. **g)** Detail of the stator/elevator interface. **h)** Detail of VHH<sub>QM3</sub>. **i)** Detail of the QM interface.



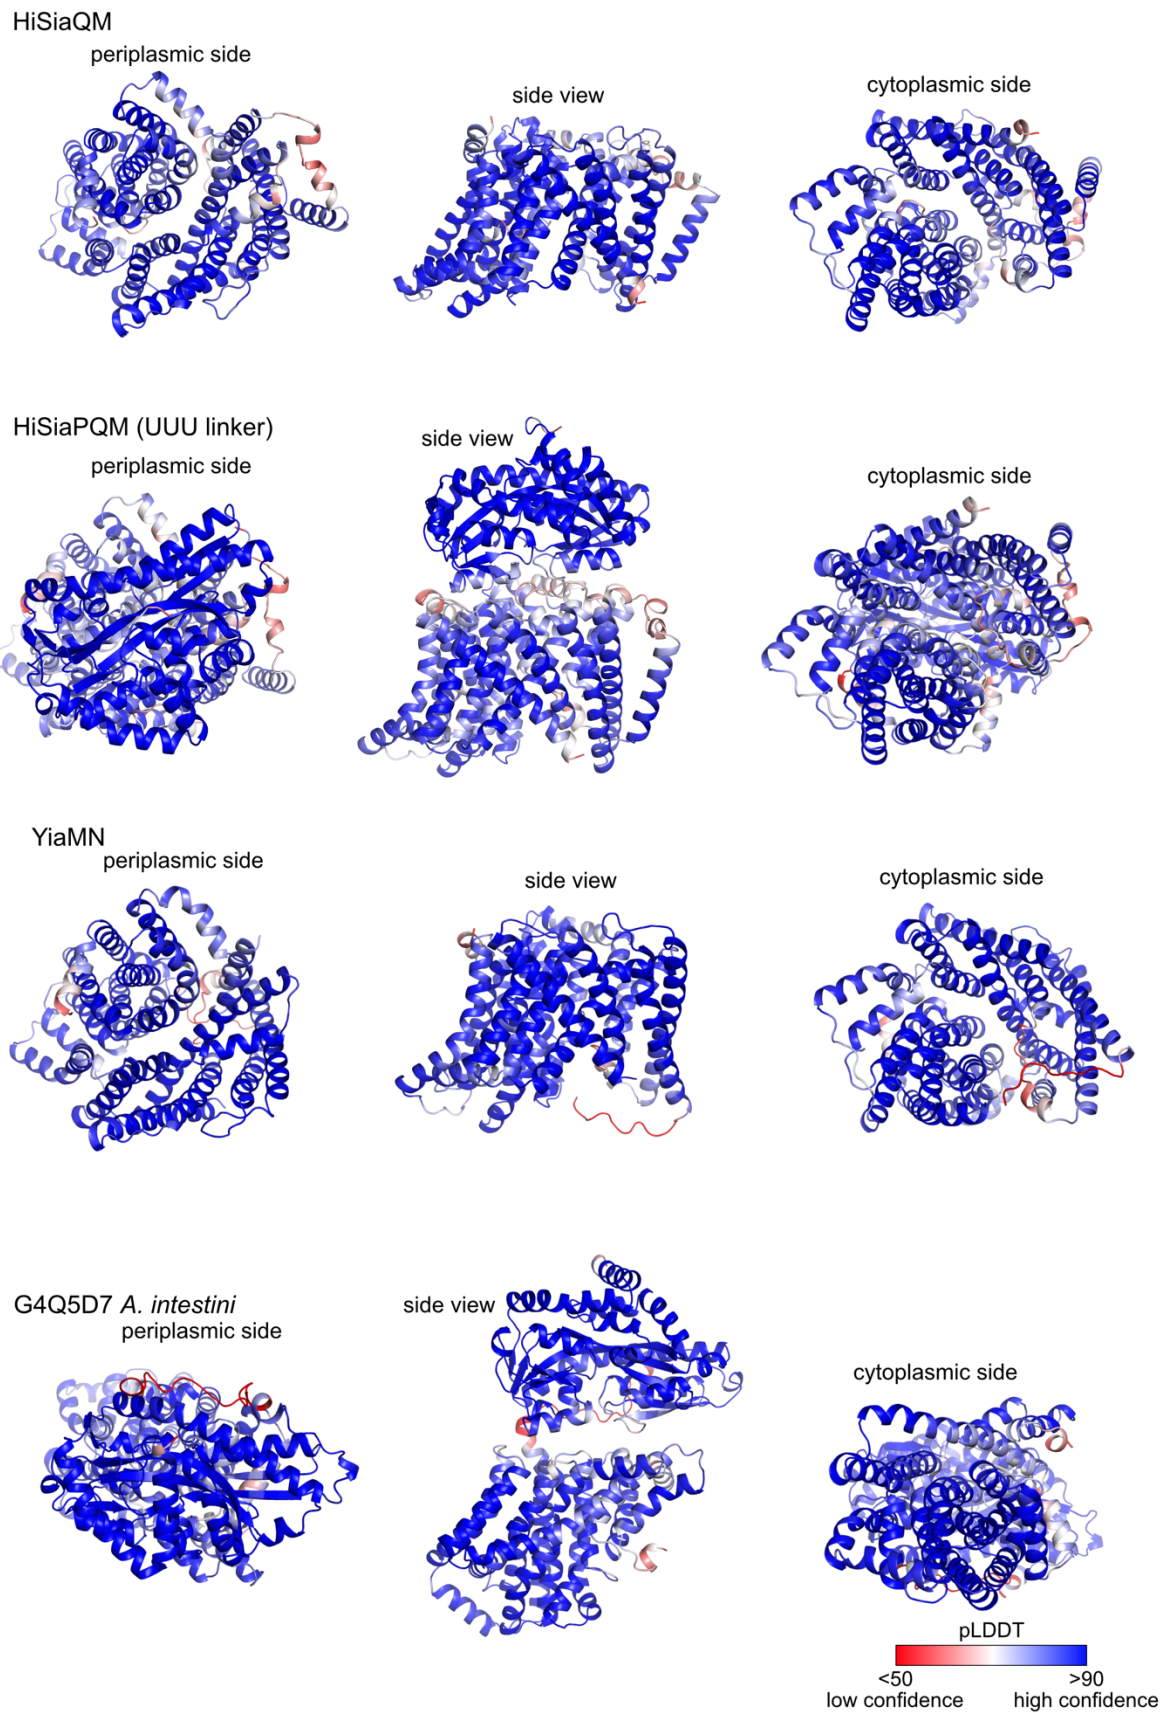

**Supplementary Fig. 6 | AlphaFold models that were used in this study.** The pLDDT confidence score is indicated by a color gradient.

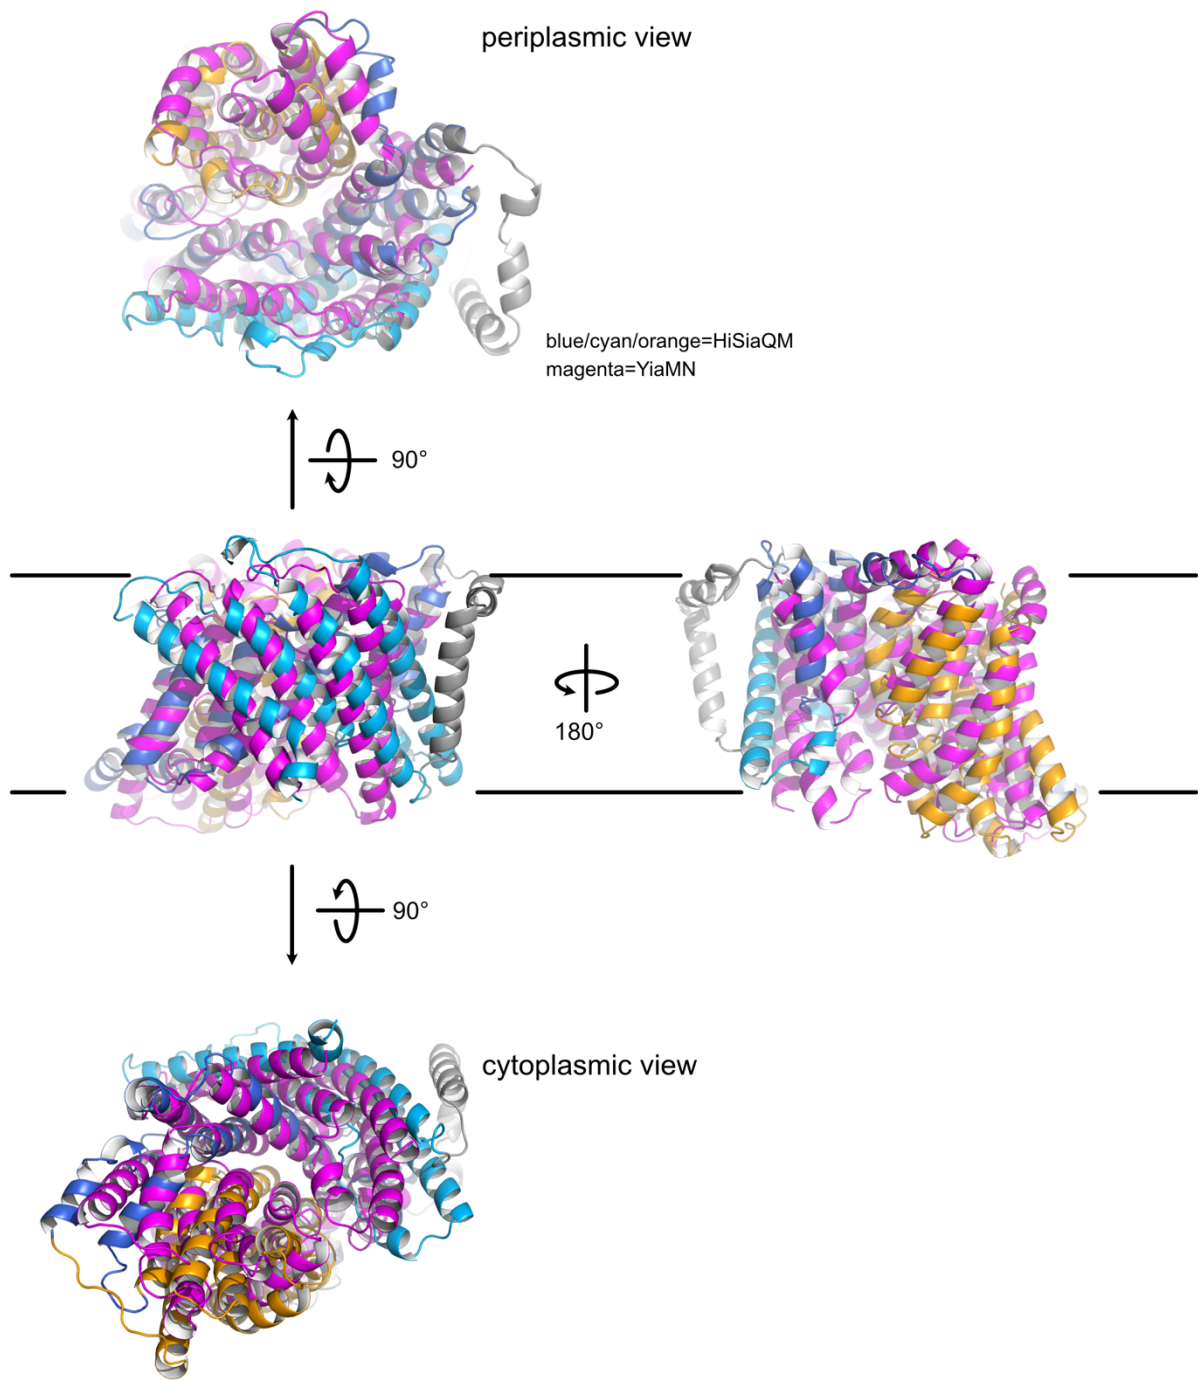

**Supplementary Fig. 7 | Comparison of the predicted structure of YiaMN to the experimental HiSiaQM structure.** The YiaMN model (magenta) is from Ovchinnikov et al.<sup>3</sup>. The HiSiaQM model was determined in this study with the color code as defined in Figure 1.

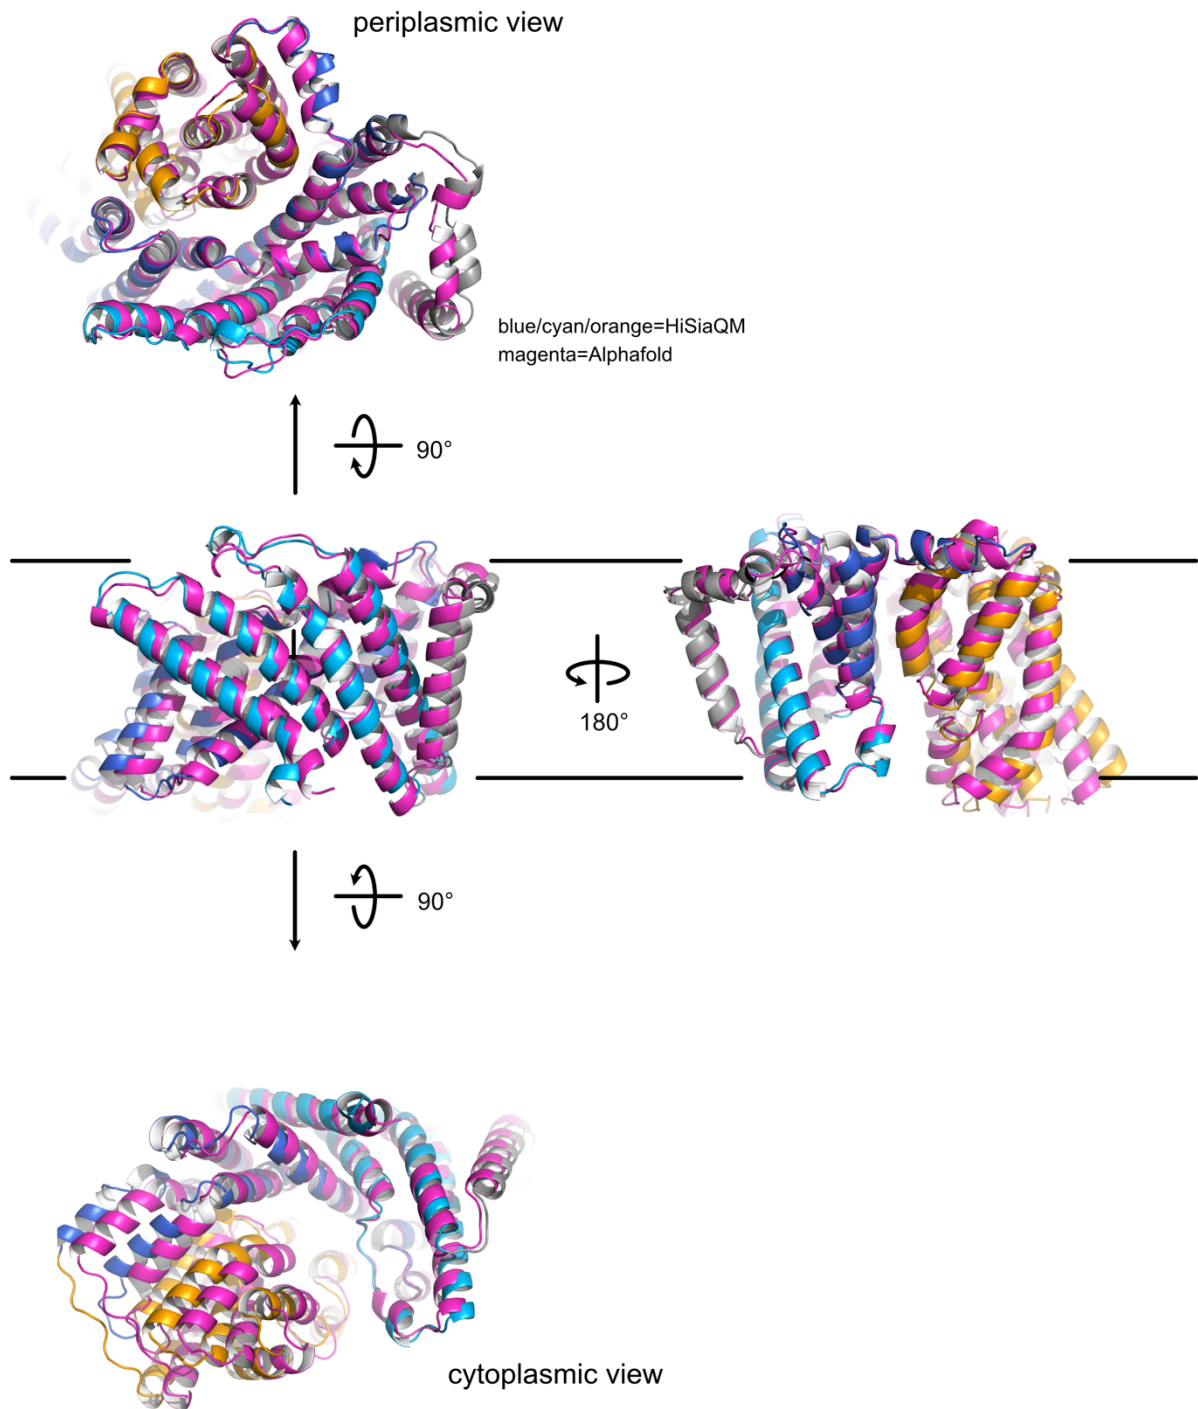

**Supplementary Fig. 8 | Alignment of the in lipid experimental HiSiaQM structure to the AlphaFold model.** The experimental structure is shown with the same color code as defined in Figure 1. The AlphaFold<sup>4</sup> model is colored magenta.

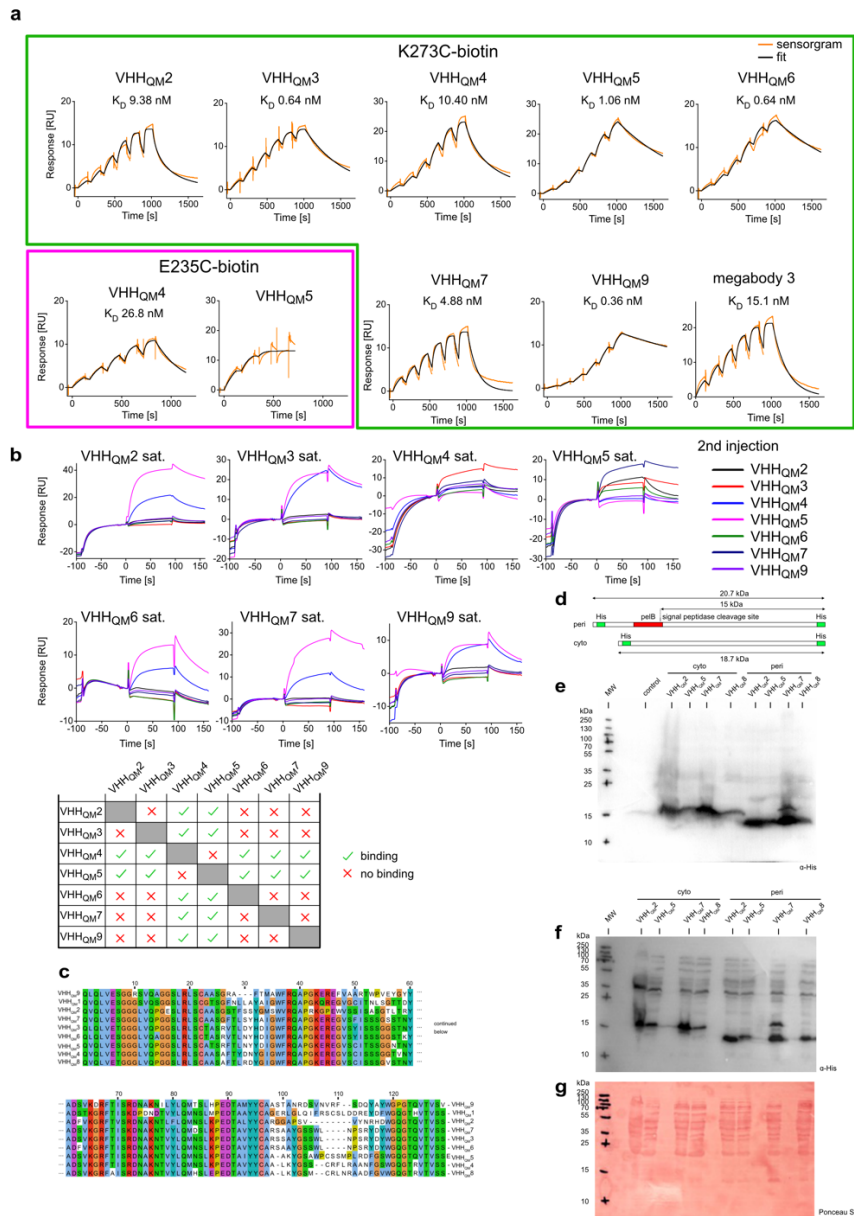

**Supplementary Fig. 9 | SPR data on HiSiaQM specific VHHs. a**, single cycle kinetics of the different VHHs. The green and magenta boxes group experiments with two different positions of the biotin label that was used for immobilization. **b**, HiSiaQM/VHH interaction was analyzed in a competitive binding experiment in which the TRAP transporter (HiSiaQM K273C-biotin), immobilized on an SPR chip, was saturated with a first VHH and the binding behavior of a second VHH was observed. The primary VHH is indicated next to the chromatogram and the secondary VHH is given by the color code. Bottom: Matrix summarizing the epitope binding results. **c**, Amino acid sequences of the VHH<sub>QMs</sub> used in this study. **d**, Constructs used to test the effect of different VHHs on Neu5Ac uptake by HiSiaPQM. The position of the pelB signal sequence and the signal peptidase cleavage site, as well as the location of the His tags are marked. **e**, Western blot (anti His) showing the expression levels of VHH<sub>QM2,5,8</sub> (weak or no inhibition of uptake) relative to VHH<sub>QM7</sub> (strong inhibition of uptake). Note that the SPR data represent a single set of experiments. The blot was independently repeated twice. **f**, The VHH samples from e) with one fourth of the amount of sample loaded to allow identification of single bands. **g**, Ponceau S stain of the blot in f) as loading control. Source data are provided as a Source Data file.



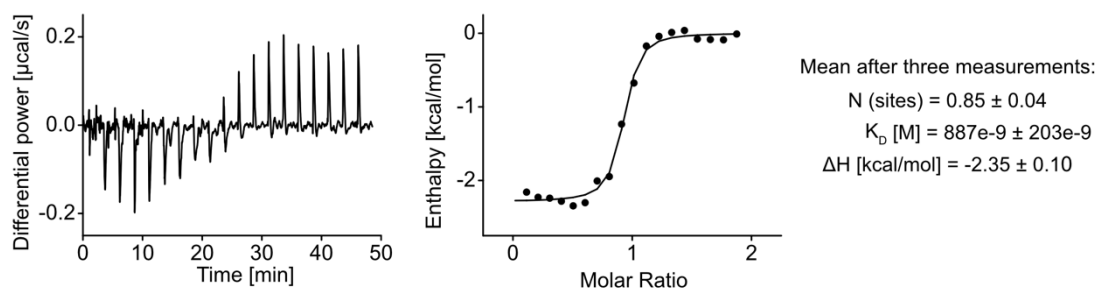

**Supplementary Fig. 10 | Characterization of HiSiaP/VHH<sub>p1</sub> binding via ITC.** Isothermal titration calorimetry experiment between HiSiaP and the HiSiaP-VHH (left) and binding curve (middle). The thermodynamic parameters from the experiment are shown on the right and are derived from n=3 independent experiments. Source data are provided as source data file.

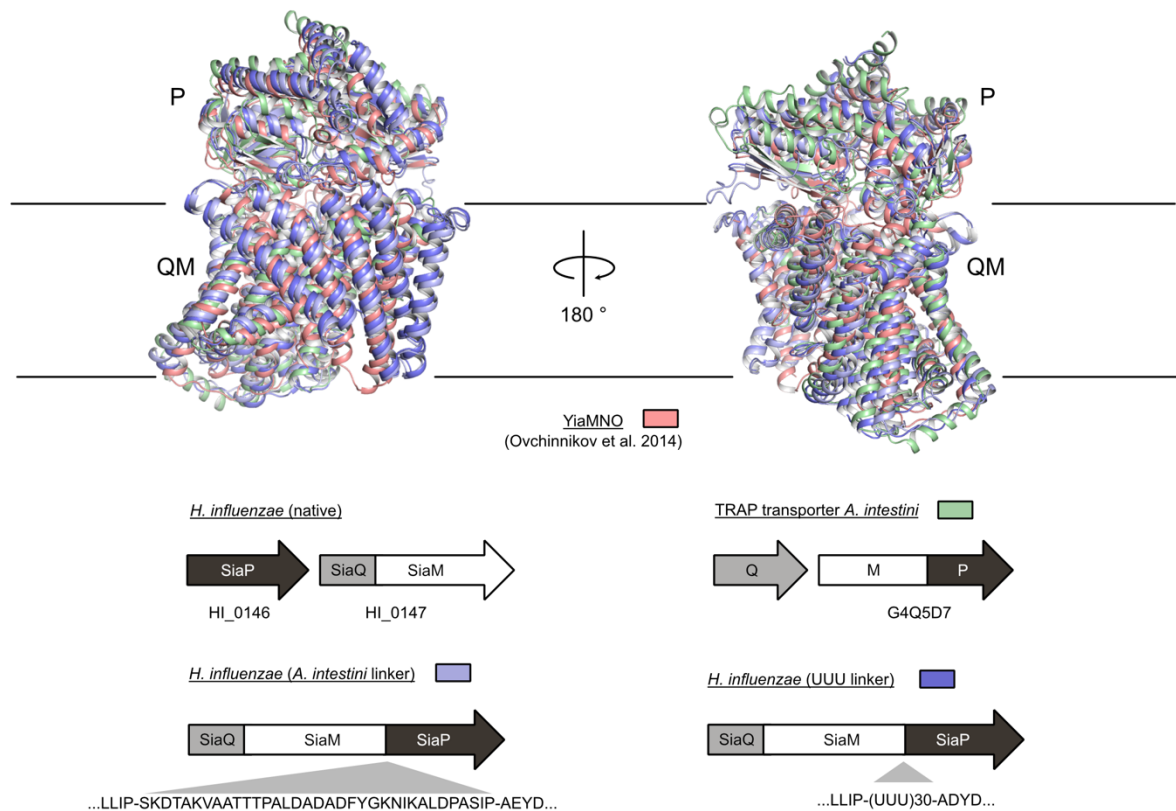

**Supplementary Fig. 11 | Comparison of models for the tripartite complex.** Four different models of the tripartite complex aligned onto each other. The colors are indicated below, next to the organization of the corresponding genes. If domains were fused for modelling, the linkers are specified next to genes. Confidence scores for the different AlphaFold models are shown in Supplementary Fig. 6.

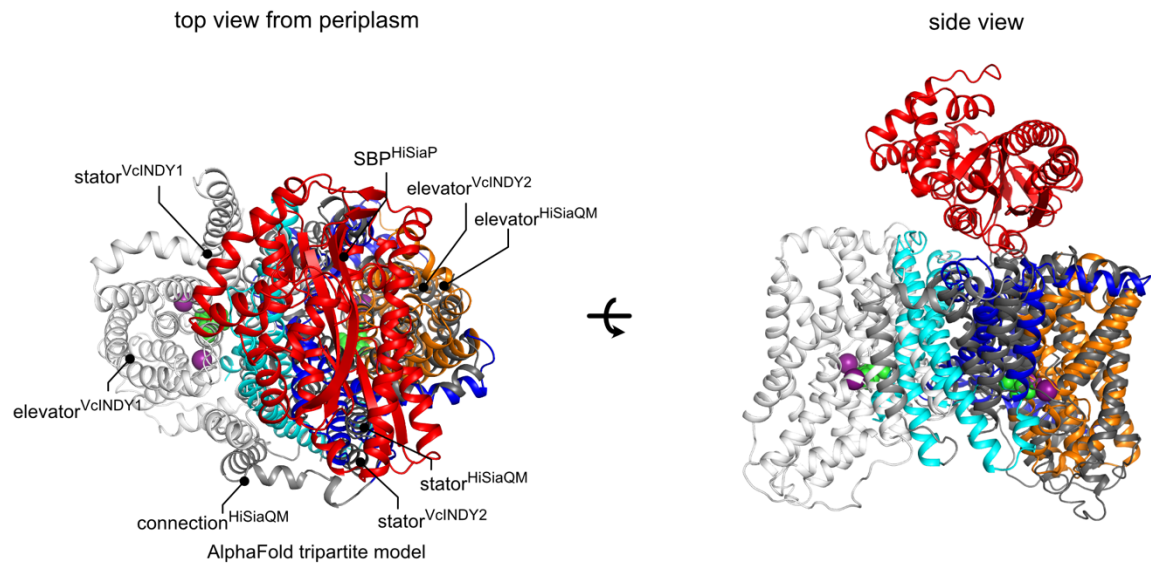

**Supplementary Fig. 12 | Alignment of the TRAP transporter HiSiaPQM with VcINDY.** Alignment of the tripartite HiSiaPQM AlphaFold model (colored as in Figure 1) from Figure 4 to VcINDY (white, 5UL9 [<http://doi.org/10.2210/pdb5UL9/pdb>]). The HiSiaP SBP is shown in red.

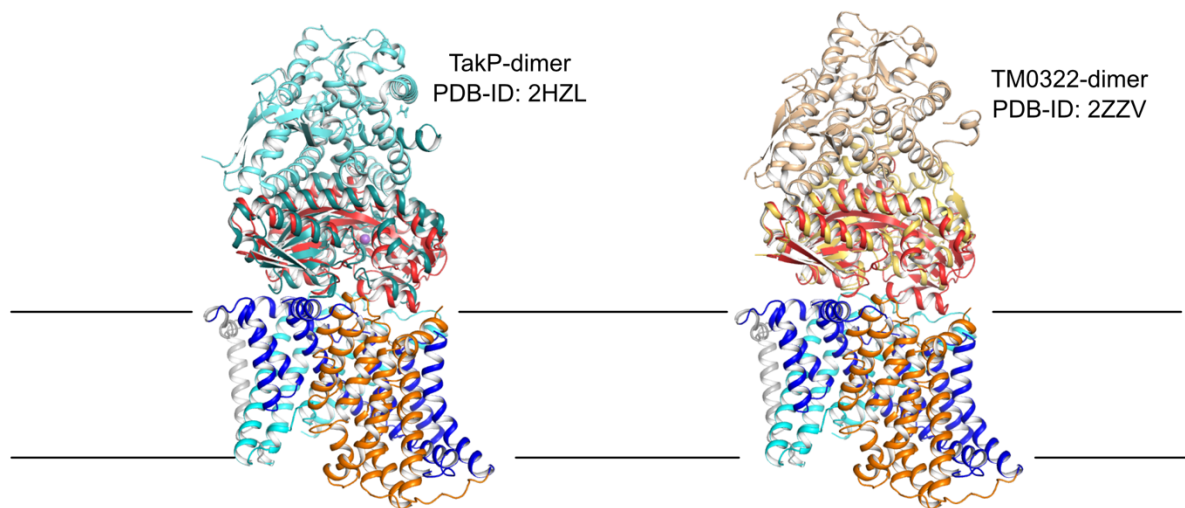

**Supplementary Fig. 13 | Orientation of dimeric SBPs in the model of the tripartite complex.** One monomer of the two different dimeric SBPs, TakP (green-blue; 2HZL [<http://doi.org/10.2210/pdb2HZL/pdb>]) and TM0322 (yellow-wheat; 2ZZV [<http://doi.org/10.2210/pdb2ZZV/pdb>]), was aligned on the HiSiaP SBP (red) in the tripartite complex as predicted by AlphaFold (Figure 4).

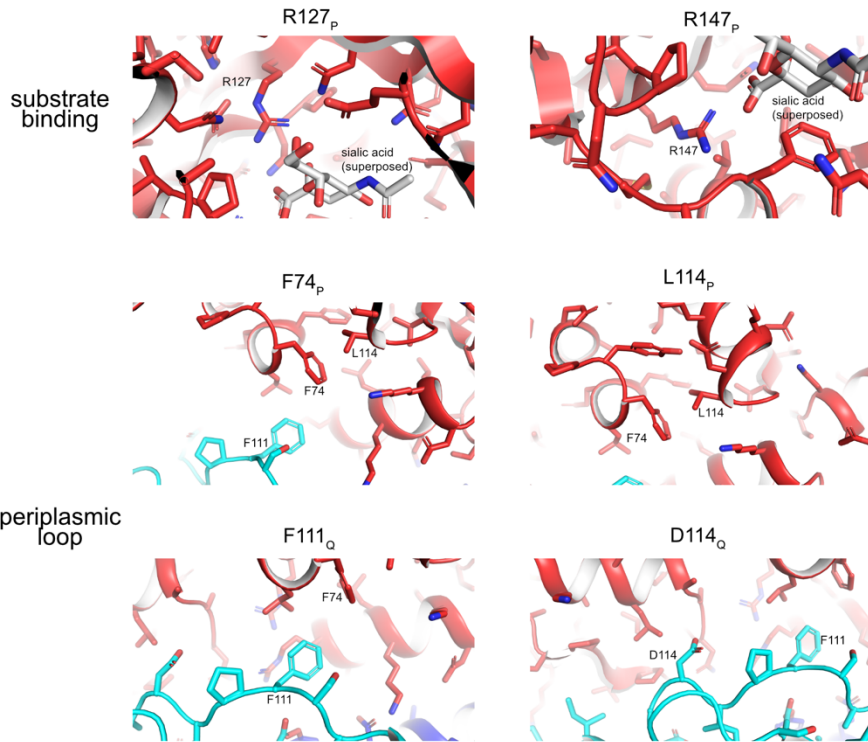

P-QM interface - N-lobe

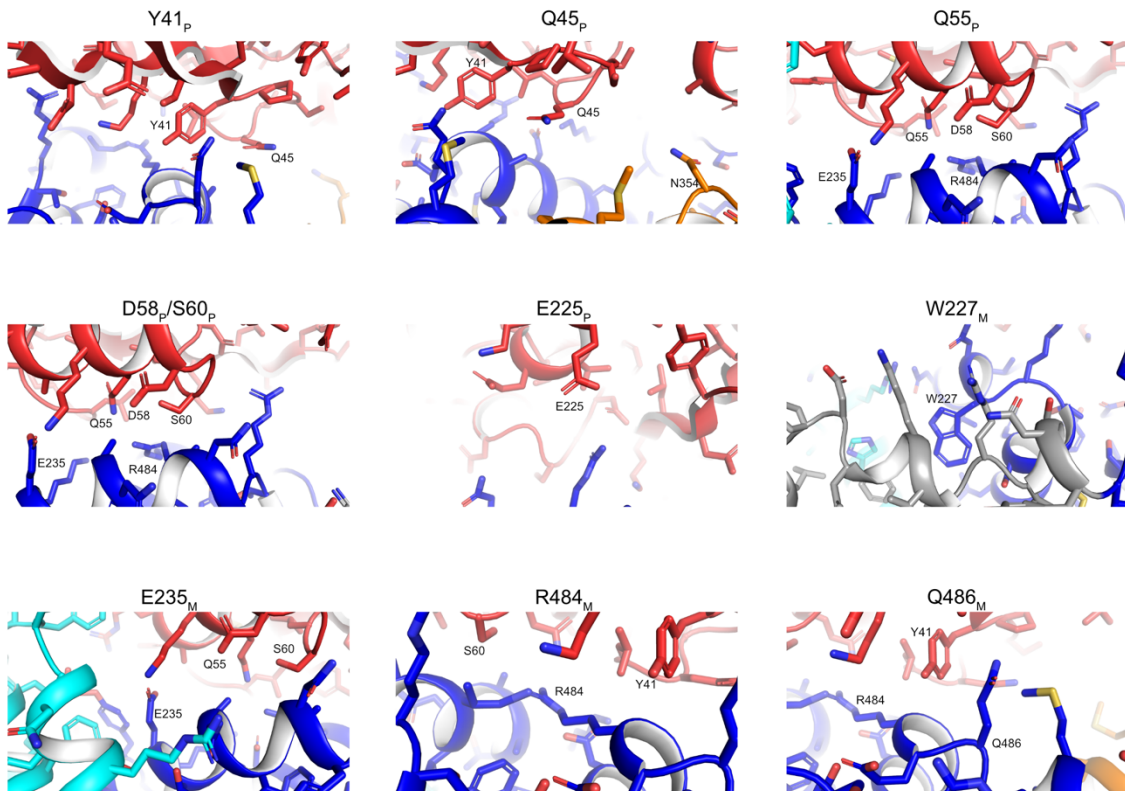

(Figure is continued on the next page)

P-QM interface - C-lobe

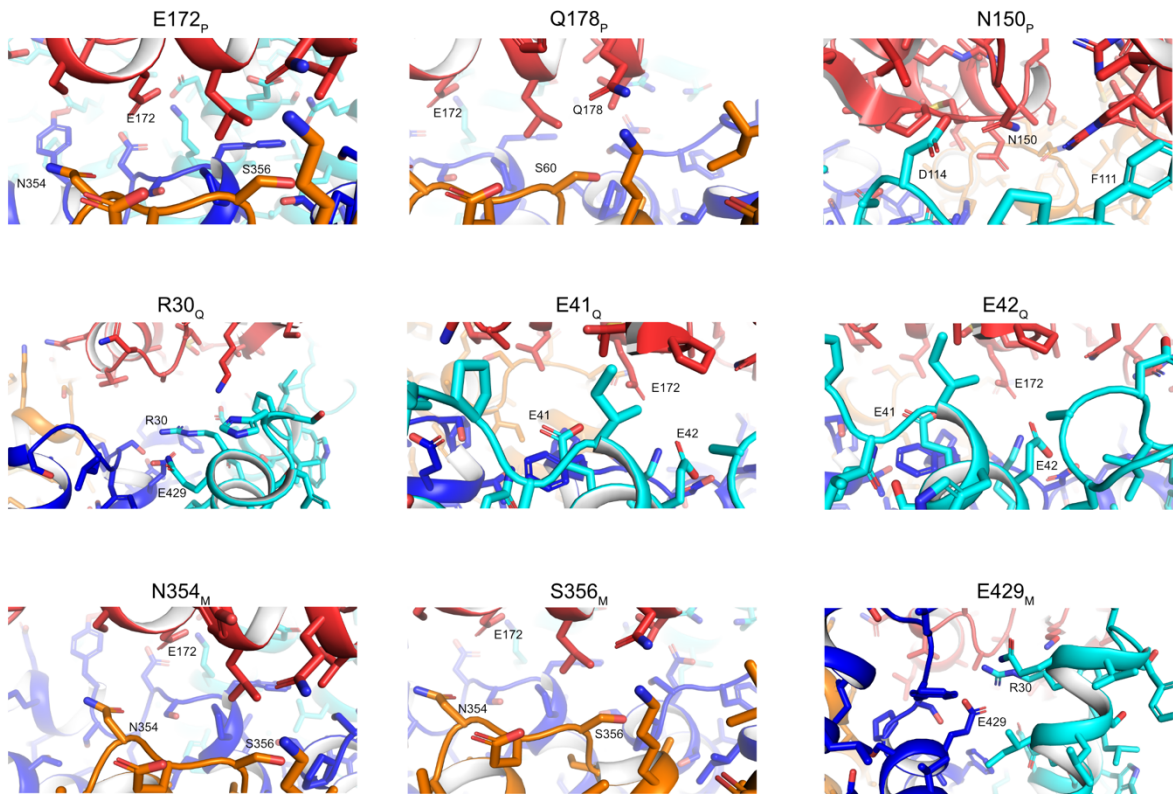

sodium binding site

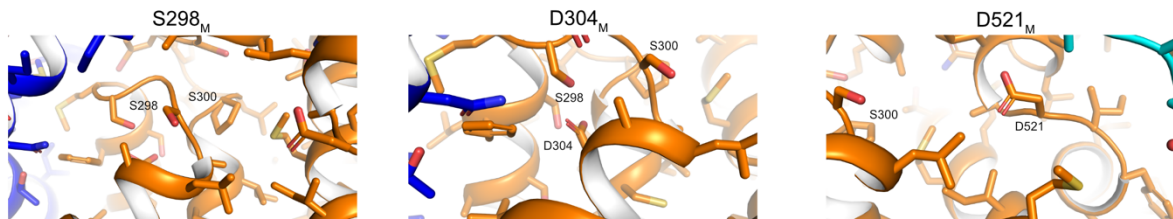

**Supplementary Fig. 14 | Close-up views of mutants from Figure 5.** All residues that were analyzed in the complementation assay (Figure 5) in the main text are shown in detail in the AlphaFold model of the tripartite complex.



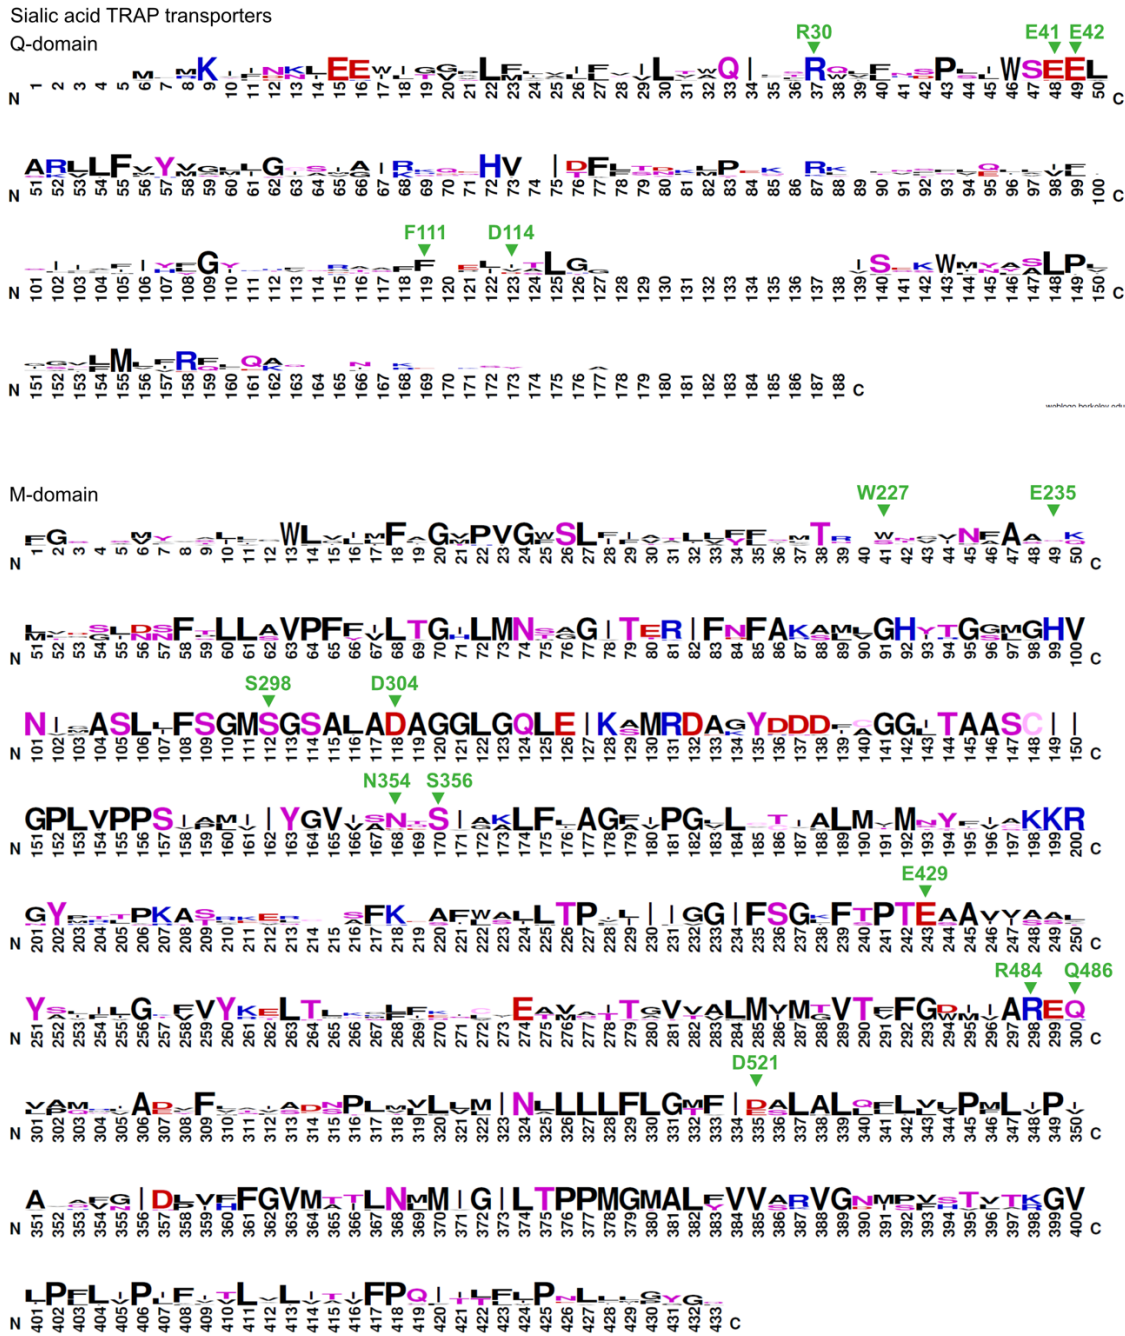

**Supplementary Fig. 15 | Sequence conservation of sialic acid TRAP transporters.** Positions in HiSiaQM that were mutated and analyzed in the complementation assay in Figure 5 are marked with green triangles with the HiSiaQM numbering indicated. Sequences (see below) were taken from Chowdhury et al. <sup>5</sup> and Vetting et al. <sup>6</sup>, with just using those with known ligands. Here, just sialic acid bound TRAP transporters are shown, the conservation of TRAP transporters which do not transport sialic acid is shown in Supplementary Fig. 16. The QM sequences were split into Q and M for the alignment using HiSiaQM as a guide. The sequences were aligned using ClustalO<sup>7</sup> in Jalview<sup>8</sup> with default settings and sequence logo motifs generated using WebLogo<sup>9</sup>. The underlying sequences are specified in Supplementary Table 5.



TRAP transporters  
M-domain

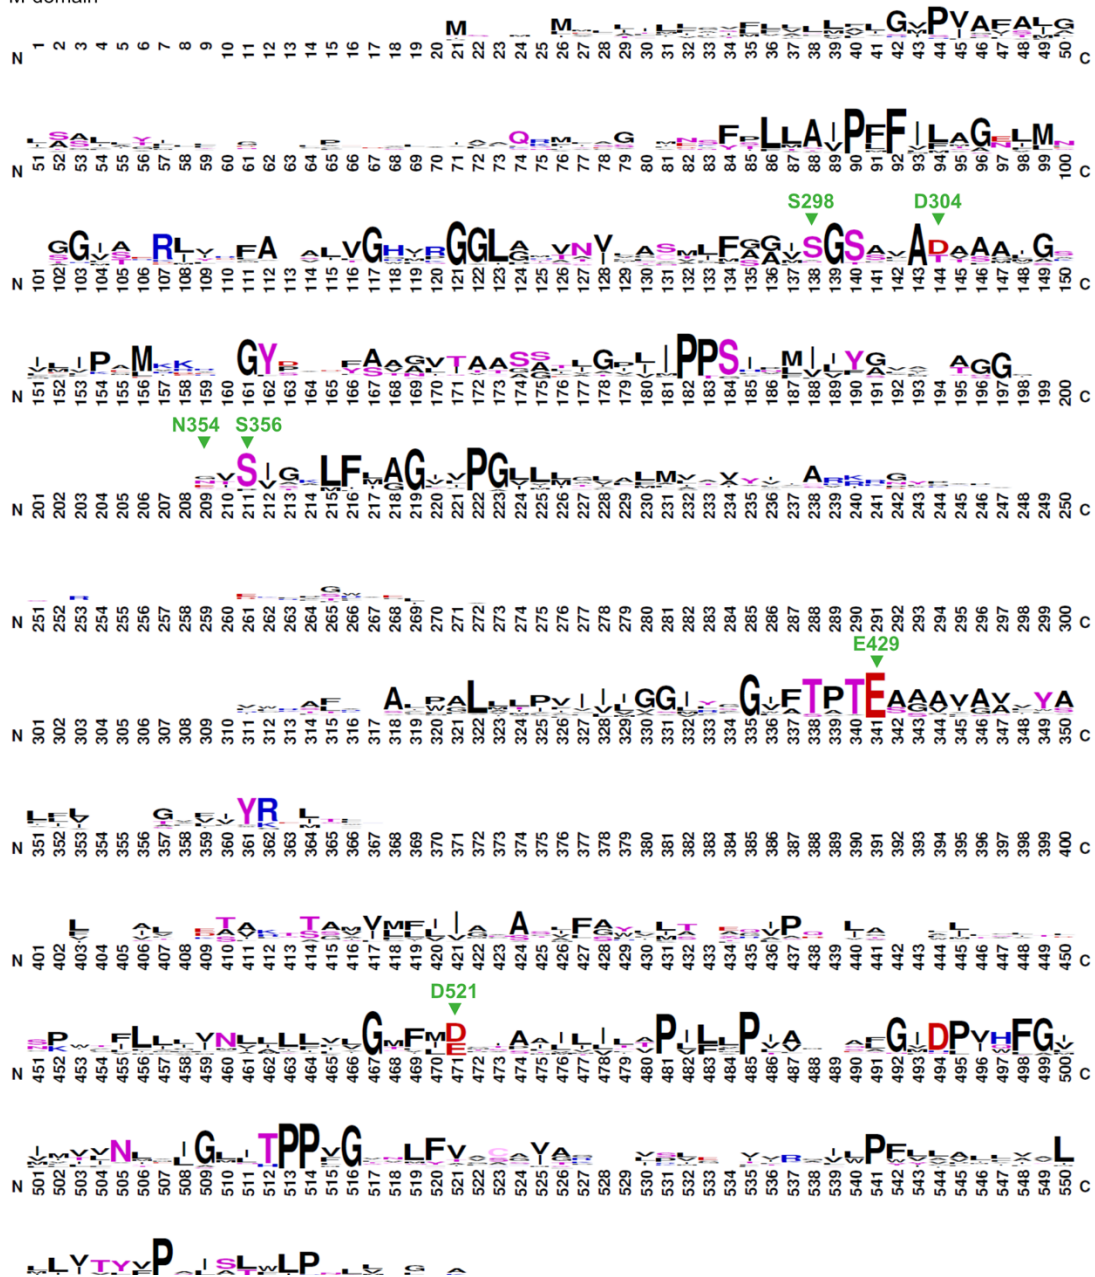

**Supplementary Fig. 16 | Sequence conservation of TRAP transporters.** Positions in HiSiaQM that were mutated and analyzed in the complementation assay in Figure 5 are marked by green triangles with the HiSiaQM numbering. As for Figure S15, sequences (see below) were taken from Chowdhury et al. <sup>5</sup> and Vetting et al. <sup>6</sup>, with just using those with known ligands. In contrast to Supplementary Fig. 15, this alignment shows TRAP transporters which do not transport sialic acid. The QM sequences were split into Q and M for alignment using HiSiaQM as a guide. The sequences were aligned using ClustalO <sup>7</sup> in Jalview <sup>8</sup> with default settings and sequence logo motifs generated using WebLogo <sup>10</sup>. The underlying sequences are specified in Supplementary Table 6.

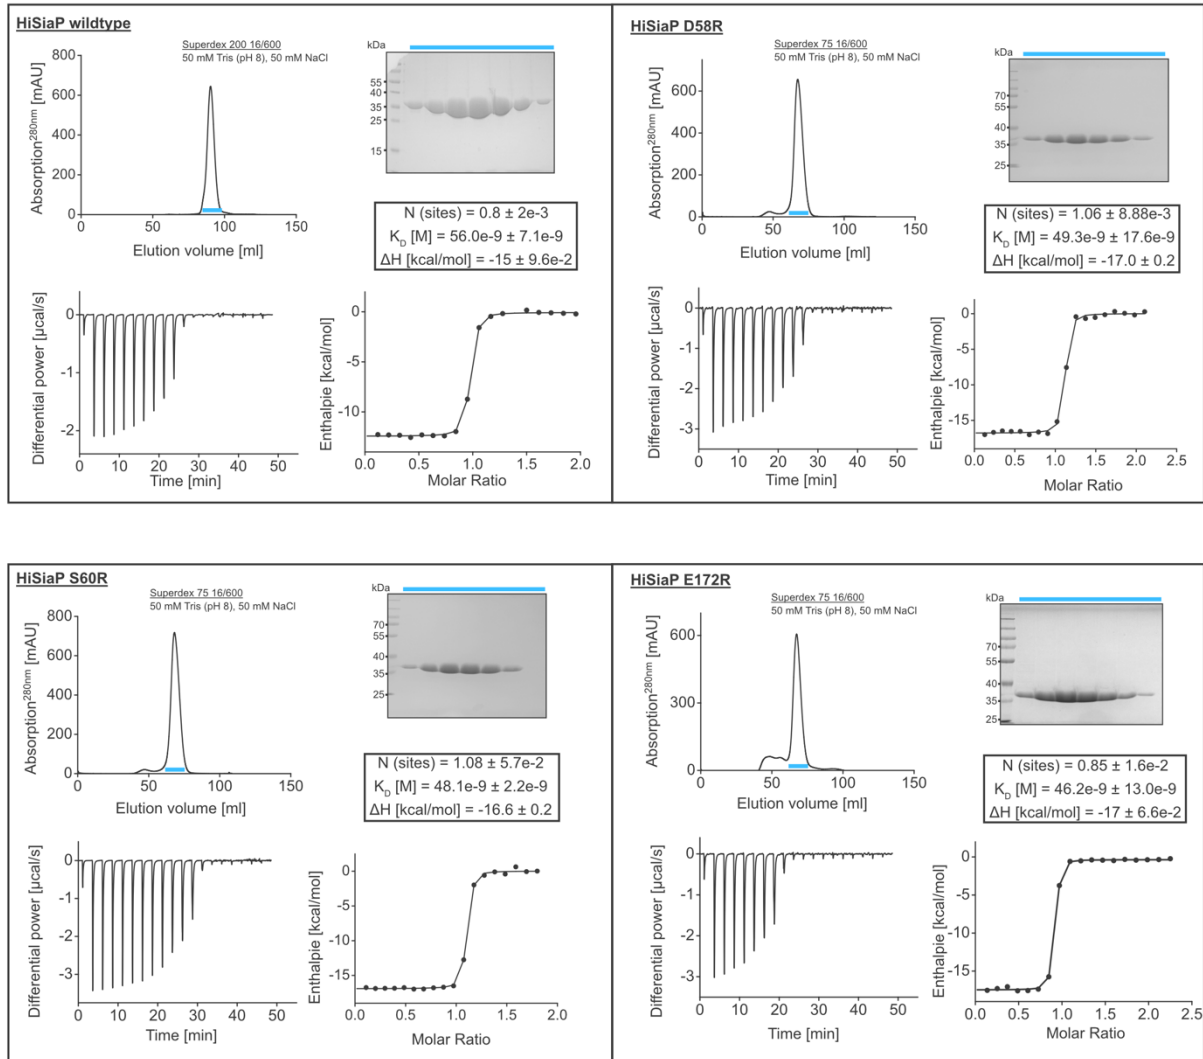

**Supplementary Fig. 17 | Gel filtration and isothermal titration calorimetry analysis of P domain mutants.** The binding parameters were determined from n=3 independent experiments. Source data are provided as source data file.

**HiSiaQM R30E** Superdex increase 200 10/300  
50 mM KH<sub>2</sub>PO<sub>4</sub> (pH 7.8),  
200 mM NaCl, 0.035% DDM

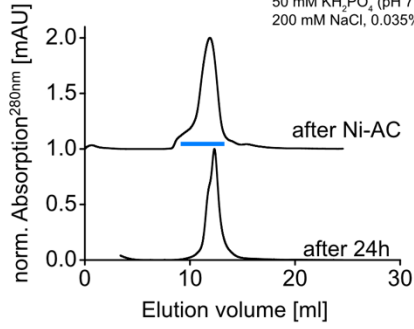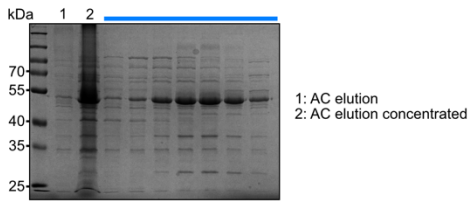

**HiSiaQM S356Y** Superdex increase 200 10/300  
50 mM KH<sub>2</sub>PO<sub>4</sub> (pH 7.8),  
200 mM NaCl, 0.035% DDM

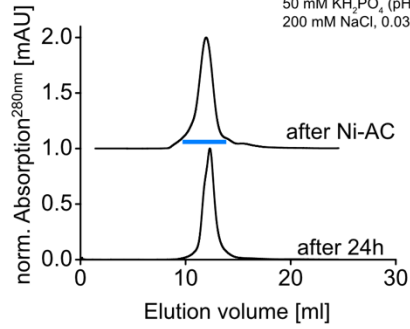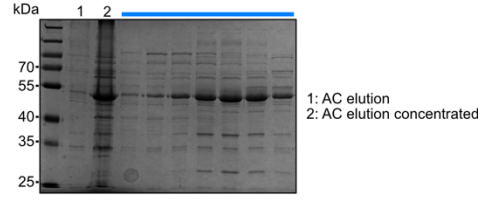

**HiSiaQM R484E** Superdex increase 200 10/300  
50 mM KH<sub>2</sub>PO<sub>4</sub> (pH 7.8),  
200 mM NaCl, 0.035% DDM

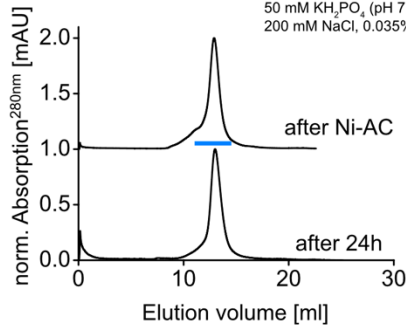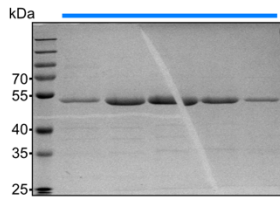

**HiSiaQM D304A** Superdex increase 200 10/300  
50 mM KH<sub>2</sub>PO<sub>4</sub> (pH 7.8),  
200 mM NaCl, 0.035% DDM

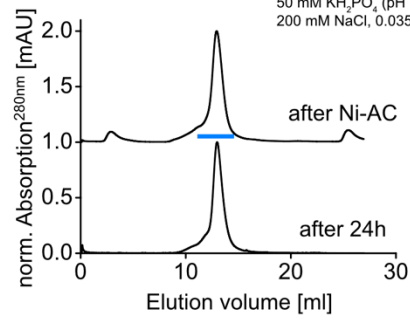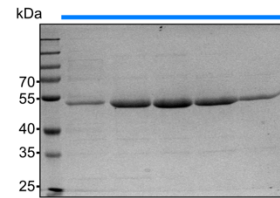

**HiSiaQM D521A** Superdex increase 200 10/300  
50 mM KH<sub>2</sub>PO<sub>4</sub> (pH 7.8),  
200 mM NaCl, 0.035% DDM

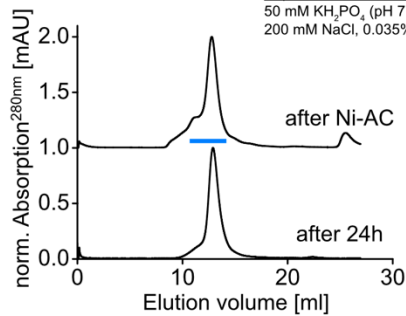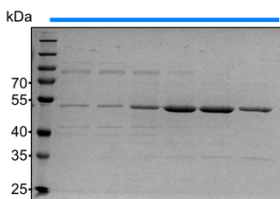

**HiSiaQM E429R** Superdex increase 200 10/300  
50 mM KH<sub>2</sub>PO<sub>4</sub> (pH 7.8),  
200 mM NaCl, 0.035% DDM

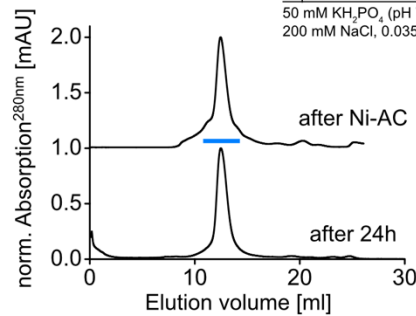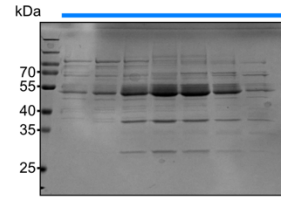

**Supplementary Fig. 18 | Expression and gelfiltration analysis of QM-domain mutants.**  
The mutants were expressed and purified once.



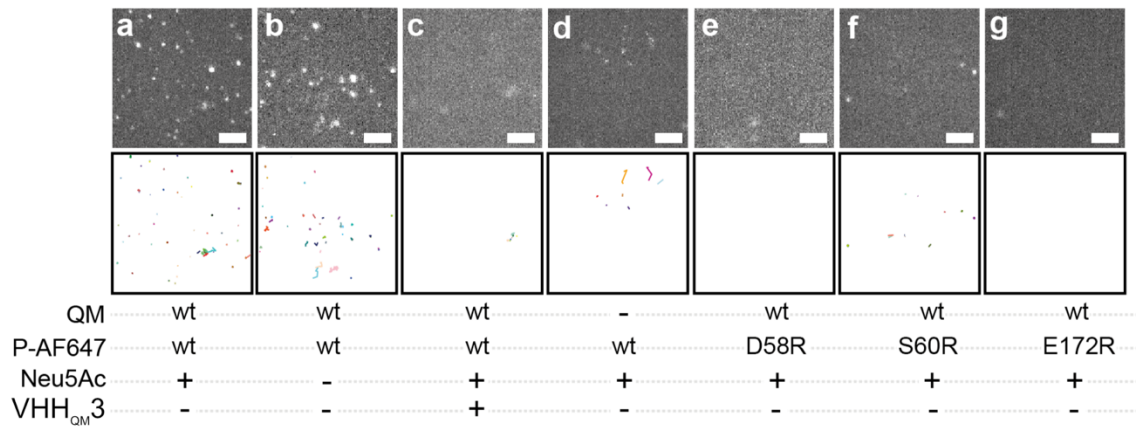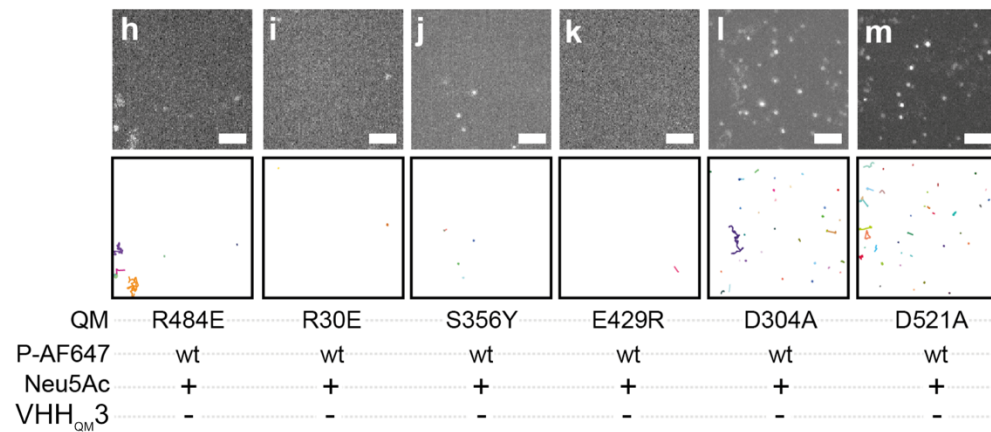

**Supplementary Fig. 19 | a-m, Maximum intensity projections (upper row) and raw traces (bottom row) of the measurements shown in Figure 6. All experiments were independently performed three or more times ( $n \geq 3$ ). The scale bars equal 3  $\mu\text{m}$ .**



**Supplementary Table 1 | Cryo-EM data collection and processing**

| <b>Sample</b>                           | HiSiaQM/Mb3 in MSP1D1-H5 nanodiscs    |
|-----------------------------------------|---------------------------------------|
| <b>Data acquisition</b>                 |                                       |
| Voltage                                 | 300 kV                                |
| Magnification                           | 81,000                                |
| Pixel size                              | 0.862 Å                               |
| Electron dose                           | 50.213 e <sup>-</sup> /Å <sup>2</sup> |
| Frame number                            | 50                                    |
| Defocus range                           | -0.8 to -2.5 μm                       |
| <b>Data processing &amp; Refinement</b> |                                       |
| EMDB code                               | EMD-13930                             |
| PDB code                                | 7QE5                                  |
| Symmetry imposed                        | No symmetry imposed                   |
| Initial number of particles             | 2,331,547                             |
| Final number of particles               | 215,956                               |
| Map resolution at 0.143 FSC             | 4.7 Å                                 |
| Local resolution range                  | 3.7-6.2 Å                             |
| Map sharpening B-factor                 | -256 Å <sup>2</sup>                   |
| <b>Refinement</b>                       |                                       |
| Initial PDBs used                       | AlphaFold model of HiSiaQM            |
| Non hydrogen atoms                      | 5,720                                 |
| Protein                                 | 5,720                                 |
| Ligands                                 | n/a                                   |
| <b>Mean B factors (Å<sup>2</sup>)</b>   |                                       |
| Protein                                 | 105.81                                |
| Ligand                                  | n/a                                   |
| <b>R. m. s. deviations</b>              |                                       |
| Bond lengths (Å)                        | 0.013                                 |
| Bond angles (°)                         | 2.056                                 |
| <b>Model validation</b>                 |                                       |
| MolProbity <sup>11</sup> score          | 1.83                                  |
| Clash score                             | 8.07                                  |
| Rotamer outliers (%)                    | 1.14                                  |
| C-beta outliers (%)                     | 2.5                                   |
| <b>Ramachandran plot</b>                |                                       |
| Favored (%)                             | 94.96                                 |
| Allowed (%)                             | 4.77                                  |
| Outliers (%)                            | 0.27                                  |

**Supplementary Table 2 | SPR binding parameters of VHHs and megabody on K273C-biotin (top) and E235C-biotin (bottom).**

|                          | <b>K<sub>D</sub> [nM]</b> | <b>k<sub>off</sub> [M<sup>-1</sup>s<sup>-1</sup>]</b> | <b>k<sub>on</sub> [s<sup>-1</sup>]</b> |
|--------------------------|---------------------------|-------------------------------------------------------|----------------------------------------|
| <b>VHH<sub>QM2</sub></b> | 9.83                      | 1.94*10 <sup>6</sup>                                  | 19.0*10 <sup>-3</sup>                  |
| <b>VHH<sub>QM3</sub></b> | 0.64                      | 3.01*10 <sup>6</sup>                                  | 1.91*10 <sup>-3</sup>                  |
| <b>VHH<sub>QM4</sub></b> | 10.40                     | 0.47*10 <sup>6</sup>                                  | 4.92*10 <sup>-3</sup>                  |
| <b>VHH<sub>QM5</sub></b> | 1.06                      | 1.01*10 <sup>6</sup>                                  | 1.07*10 <sup>-3</sup>                  |
| <b>VHH<sub>QM6</sub></b> | 0.64                      | 1.54*10 <sup>6</sup>                                  | 0.98*10 <sup>-3</sup>                  |
| <b>VHH<sub>QM7</sub></b> | 4.88                      | 1.62*10 <sup>6</sup>                                  | 7.92*10 <sup>-3</sup>                  |
| <b>VHH<sub>QM9</sub></b> | 0.36                      | 1.27*10 <sup>6</sup>                                  | 0.46*10 <sup>-3</sup>                  |
| <b>Megabody 3</b>        | 15.1                      | 0.35*10 <sup>6</sup>                                  | 5.34*10 <sup>-3</sup>                  |

|                          | <b>K<sub>D</sub> [nM]</b> | <b>k<sub>off</sub> [M<sup>-1</sup>s<sup>-1</sup>]</b> | <b>k<sub>on</sub> [s<sup>-1</sup>]</b> |
|--------------------------|---------------------------|-------------------------------------------------------|----------------------------------------|
| <b>VHH<sub>QM4</sub></b> | 26.8                      | 0.14*10 <sup>6</sup>                                  | 3.68*10 <sup>-3</sup>                  |

**Supplementary Table 3 | Raw data for Fig. 6q.**

| QM                         | wt    | wt         | wt         | wt         | wt        | wt         | wt         | R484E      | R30E       | S356Y     | E429R      | D521A      | D304A      |
|----------------------------|-------|------------|------------|------------|-----------|------------|------------|------------|------------|-----------|------------|------------|------------|
| P-AF647                    | wt    | wt         | wt         | wt         | D58R      | S60R       | E127R      | wt         | wt         | wt        | wt         | wt         | wt         |
| Neu5Ac                     | +     | -          | +          | +          | +         | +          | +          | +          | +          | +         | +          | +          | +          |
| VHHQM3                     | -     | +          | -          | -          | -         | -          | -          | -          | -          | -         | -          | -          | -          |
| Sample 1                   | 6984  | 4713       | 1289       | 348        | 723       | 1646       | 389        | 92         | 643        | 485       | 25         | 7584       | 4453       |
| Sample 2                   | 7935  | 2219       | 227        | 418        | 126       | 2136       | 423        | 774        | 397        | 301       | 30         | 7552       | 5892       |
| Sample 3                   | 6364  | 3730       | 638        | 239        | 739       | 2321       | 2082       | 401        | 506        | 1835      | 134        | 6851       | 6731       |
| Total                      | 21283 | 10662      | 2154       | 1005       | 1588      | 6103       | 2894       | 1267       | 1546       | 2621      | 189        | 21987      | 17076      |
| Total interaction/s        | 23,65 | 11,85      | 2,39       | 1,12       | 1,76      | 6,78       | 3,22       | 1,41       | 1,72       | 2,91      | 0,21       | 24,43      | 18,97      |
| Normed total interaction/s | 1,00  | 0,50       | 0,10       | 0,05       | 0,07      | 0,29       | 0,14       | 0,06       | 0,07       | 0,12      | 0,01       | 1,03       | 0,80       |
| SD                         | 0,08  | 0,13       | 0,05       | 0,01       | 0,04      | 0,04       | 0,10       | 0,03       | 0,01       | 0,09      | 0,01       | 0,04       | 0,12       |
| p Value                    |       | 0,00724631 | 0,00031997 | 0,00012462 | 0,0001934 | 0,00053358 | 0,00052699 | 0,00017892 | 0,00014167 | 0,0007284 | 0,00010523 | 0,67266556 | 0,15723476 |

**Supplementary Table 4 | Sequences of used primers.**

| <b>Primer</b>                            | <b>Sequence</b>                                                                                                                                      |
|------------------------------------------|------------------------------------------------------------------------------------------------------------------------------------------------------|
| HiSiaQM K273C                            | forward: AGGTGGGATTACCGAACGTATTTTAAATTTTGCTTGTGCCTTACTC<br>reverse: CCATTCTCTCTGTGTAATGACCGAGTAAAGGCACAAGCAAAAT                                      |
| HiSiaQM E235C                            | forward: ATGACACGTTGGAACGTCGTAATGCCGCAACTGTAAATTAGTC<br>reverse: GTAATGGGAAGCTGTCTAGGCTATAGACTAATTTACAAGTTGCGG                                       |
| Amplification VHH for cloning in pET28a  | forward (+pelB): GATCCGGGATCCATGAAATACCTATTGCTTACGGC<br>forward (-pelB): GATCCGGGATCCATGCAGGTGCAGCTCGTGGG<br>reverse: CAGTACCTCGAGTGAGGAGACGGTGACCTG |
| Amplification VHH with SapI for megabody | forward: GATCCTGCTCTTCCGGGTCTCTGAGACTCTCT<br>reverse: CCTGCAGCTCTTCTTGGGTCCCTGGCCC                                                                   |
| MSP1D1-H5 deletion primer                | forward: GGAACCGAGCCATTAGGCGAAGAAATGCGCGATC<br>reverse: TAATGGGCTCGGTTCCACCTTTTGACGATATAATTCCATCTC                                                   |
| HiSiaPQM R127A <sub>P</sub>              | forward: GGAAGTGCCTAAACGACTTCAAATCGTGCAATCAACAGTAT<br>reverse: TCGTTTGGGCAGTTCGGTTATAAGCTTGGGAAAAGTAAAGTC                                            |
| HiSiaPQM R147A <sub>P</sub>              | forward: CTTAAAACCTGCTGTGCCAAATGCAGCAACAACTTAGCCTA<br>reverse: GGCACAGCAAGTTTTAAGCCTTTCATATCTGCAATACTGTTG                                            |
| HiSiaPQM F74S <sub>P</sub>               | forward: CAGCTGAGTTACCCTGAAGCGGCAGTATTGCTTAC<br>reverse: CAGGGTAACTCAGCTGGAAGCGAGCAGATTCTGCAAA                                                       |
| HiSiaPQM L114S <sub>P</sub>              | forward: GATAAAGATAGTGGCGTGACTTTACTTTCCCAAGCTTATAACG<br>reverse: CACGCCACTATCTTTATCCATTTTTTTAATTAATCTTTACCGAATTCTG                                   |
| HiSiaPQM F111A <sub>Q</sub>              | forward: GCATCAGCCCCTATTGATGCCTTAGGAGGCATTCTGAAAAA<br>reverse: CAATAGGGGCTGATGCACCGTTAAAAGTACGAATACCGAAATG                                           |
| HiSiaPQM D114K <sub>Q</sub>              | forward: CCTAAGGCCTTAATAGGGAATGATGCACCGTTAAAAGTACGAAT<br>reverse: CCCTATTAAGGCCTTAGGAGGCATTCTGAAAAATGGATTTTCG                                        |
| HiSiaPQM Y41A <sub>P</sub>               | forward: AACTTGGAGCAAGTGAATTTCAATTTTACCCTGTGATTTTTCTTTG<br>reverse: AATTTCACTTGCTCCAAGTTCACAATTAGGTGATGACCGTG                                        |
| HiSiaPQM Q45A <sub>P</sub>               | forward: CAAGTTCAGCATTAGGTGATGACCGTGCAATGTTAAAACAATTAAG<br>reverse: CACCTAATGCTGAACTTGGATAAAGTAAAATTTCAATTTTACCCTGTG                                 |
| HiSiaPQM Q45R <sub>P</sub>               | forward: CAAGTTCAGGTTAGGTGATGACCGTGCAATGTTAAAACAATTAAG<br>reverse: CACCTAATGCTGAACTTGGATAAAGTAAAATTTCAATTTTACCCTGTG                                  |
| HiSiaPQM Q55R <sub>P</sub>               | forward: CAATGTTAAAAGATTAAGGACGGTCTCTCGACTTTACCTTTGCGAG<br>reverse: CGTCTTTAATCTTTTAAACATTGCACGGTCATCACCTAATTGTGAAC                                  |
| HiSiaPQM D58N <sub>P</sub>               | forward: CAATTA AAAACGGTCTCTCGACTTTACCTTTGCAGAATCTGCT<br>reverse: GAGAGAACCGTTTTTAATTGTTTAAACATTGCACGGTCATCAC                                        |
| HiSiaPQM D58R <sub>P</sub>               | forward: CAATTA AAAAGAGGTTCTCTCGACTTTACCTTTGCAGAATCTGCT<br>reverse: GAGAGAACCTTTTTTAATTGTTTAAACATTGCACGGTCATCAC                                      |
| HiSiaPQM S60R <sub>P</sub>               | forward: AGACGGTAGACTCGACTTTACCTTTGCAGAATCTGCTC<br>reverse: GTCGAGTCTACCGTCTTTAATGTGTTTAAACATTGCACGGTC                                               |
| HiSiaPQM E225Q <sub>P</sub>              | forward: GACTTATAAAACAACCTCCCTGAAGATCTTCAAAAAGTCGTAAGATGC<br>reverse: CAGGGAGTTGTTTATAAGTCTCGTTGCTTACTAAATAAGTTGGTCAT                                |
| HiSiaPQM W227R <sub>M</sub>              | forward: GACACGTAGGAACGTCGTAATGCCGCAACTGAAAAATTAG<br>reverse: GACGTTCTACGTGTCATAGAAAAATAAAGTAGAGTAGCAATAAATAAG                                       |
| HiSiaPQM E235R <sub>M</sub>              | forward: CCGCAACTAGAAAATTAGTCTATAGCCTAGACAGCTTCCATTAC<br>reverse: GACTAATTTTCTAGTTGCGGCATTTACGACGTTCCAACGTGTC                                        |
| HiSiaPQM R484E <sub>M</sub>              | forward: CTTGTTCTCCGCAATCATATCGCCAAAGAAAGTCACGGTC<br>reverse: GATTGCGGAGGAACAAGTCGCAATGCGTGTGCTGATGT                                                 |
| HiSiaPQM Q486A <sub>M</sub>              | forward: CGTGAAGCAGTCGCAATGCGTGTGCTGATGTGTTGTT<br>reverse: TTGCGACTGCTTACGCGCAATCATATCGCCAAAGAAAAG                                                   |
| HiSiaPQM E172R <sub>P</sub>              | forward: GCATTTTCTAGAGTTTATCTTGCCTTACAAACCAATGCCGTCG<br>reverse: CAAGATAAACTCTAGAAAATGCCATTGGTGTGGTGATGCACC                                          |
| HiSiaPQM Q178A <sub>P</sub>              | forward: GCGTTAGCAACCAATGCCGTCGATGGTCAAGAAAACCC                                                                                                      |

|                                               |                                                                                                                       |
|-----------------------------------------------|-----------------------------------------------------------------------------------------------------------------------|
|                                               | reverse: GCATTGGTTGCTAACGCAAGATAAACTTCAGAAAATGCCATTGG                                                                 |
| HiSiaPQM N150D <sub>P</sub>                   | forward: GTGTGCCAGATGCAGCAACAACTTAGCCTATGCTAAATATGTTG<br>reverse: GCTGCATCTGGCACACGAAGTTTTAAGCCTTTCATATCTGCAATA       |
| HiSiaPQM R30E <sub>Q</sub>                    | forward: GAAAACTTGCTCTGAAAGAATTTGAGCGATAAGAATACCGAAAATG<br>reverse: TTCTTTCAGAGCAAGTTTTTCATTCTCCGTTAATTTGGAGTGAAGAA   |
| HiSiaPQM E41Q <sub>Q</sub>                    | forward: GCGAGTTCTTGACTCCAAATTAACGGAGAATGAAAACTTGGC<br>reverse: GGAGTCAAGAACTCGCCAAGCTCTTATTGTTTACGTGGG               |
| HiSiaPQM E42Q <sub>Q</sub>                    | forward: GCGAGTTGTTCACTCCAAATTAACGGAGAATGAAAACTTGGC<br>reverse: GGAGTGAACAACCTCGCCAAGCTCTTATTGTTTACGTGGG              |
| HiSiaPQM E41Q <sub>Q</sub> /E42Q <sub>Q</sub> | forward: GCGAGTTGTTGACTCCAAATTAACGGAGAATGAAAACTTGGC<br>reverse: GGAGTCAACAACCTCGCCAAGCTCTTATTGTTTACGTGGG              |
| HiSiaPQM N354Y <sub>M</sub>                   | forward: ATAGATTCGTAGGCAATTACACCGTAAATAATCATTGCAATACTT<br>reverse: TAATTGCCTACGAATCTATCGCAAACTCTTTATTGCAGGTTTTAT      |
| HiSiaPQM S356Y <sub>M</sub>                   | forward: GCCAATGAATATATCGCAAACTCTTTATTGCAGGTTTTATTCCAG<br>reverse: TTTGCGATATATTCAATTGGCAATTACACCGTAAATAATCATTGCAATAC |
| HiSiaPQM E429R <sub>M</sub>                   | forward: GTCCAACAAGATCTGCCATTGTTGCAGCAGCATACTCTG<br>reverse: GGCAGATCTTGTGGACTGAATAAGCCTGAAAAAATACCACC                |
| HiSiaPQM S298A <sub>M</sub>                   | forward: CTGGTATGGCAGGTTGAGCACTTGTGATGCGGG<br>reverse: GAACCTGCCATACCAGAGAACAATAAACTTGCGCCGATATT                      |
| HiSiaPQM D304A <sub>M</sub>                   | forward: CTTGCTGCTGCGGGGGCTTAGGTCAATTGAAAATC<br>reverse: CCCGCAGCAGCAAGTGCTGAACCTGACATACCAGA                          |
| HiSiaPQM D521A <sub>M</sub>                   | forward: GTTCATTGCTGCCCTAGCATTACAATTTTAGTATTACCAATGCTTATT<br>reverse: CTAGGGCAGCAATGAACATTCCAAGAAAAAGTAACAGTGCCT      |
| HiSiaP K254C                                  | forward: CAAAATATCACACTAAATTATTCGTAGATGGAGAGTGTGATTTAGTC<br>reverse: CACGCCTGTTTTTCAAAGAATGTGACTAAATCACACTCTCC        |
| VHH <sub>QM3</sub> S85C                       | forward: CAAATGAACTGCCTGAAACCTGAGGACACAGCCGTTTATTAC<br>reverse: GTTTCAGGCAGTTCATTTGAAGATACACCGTGTCTTGGCGT             |

**Supplementary Table 5 | Sequences used for the conservation plot in Supplementary Fig. 15**

| <b>Q-domain</b>      | <b>residues</b> |
|----------------------|-----------------|
| NMPREF0198_0032-SiaQ | 1-152           |
| NT05HA_0543-SiaQ     | 1-153           |
| FN1473-SiaQ          | 1-153           |
| GGC_1730-SiaQ        | 1-153           |
| SiaQ-HI              | 1-153           |
| UMN179_02202-SiaQ    | 1-156           |
| Trebr_2165-SiaQ      | 1-157           |
| PM1708-SiaQ          | 1-160           |
| VV2_0733-SiaQ        | 1-168           |
| PCNPT3_02946-SiaQ    | 1-169           |
| P3TCK_01175-SiaQ     | 1-170           |
| VPMS16_3066-SiaQ     | 1-173           |
| VC1779-SiaQ          | 1-173           |
| <b>M-domain</b>      | <b>residues</b> |
| Trebr_2166-SiaM      | 1-427           |
| P3TCK_01175-SiaM     | 1-427           |
| VV2_0733-SiaM        | 1-427           |
| VPMS16_3066-SiaM     | 1-427           |
| PCNPT3_02946-SiaM    | 1-427           |
| VC1779-SiaM          | 1-427           |
| NMPREF0198_0032-SiaM | 1-429           |
| PM1708-SiaM          | 1-429           |
| SiaM-HI              | 1-429           |
| GGC_1730-SiaM        | 1-429           |
| NT05HA_0543-SiaM     | 1-429           |
| FN1473-SiaM          | 1-430           |
| UMN179_02202-SiaM    | 1-430           |



**Supplementary Table 6 | Sequences used for the conservation plot in Supplementary Fig. 16**

| <b>Q-domain</b>   | <b>residues</b> |
|-------------------|-----------------|
| N1258-SiaQ        | 1-147           |
| EFER_1530-SiaQ    | 1-158           |
| Clobol_03198-SiaQ | 1-158           |
| Bpro_3107-SiaQ    | 1-162           |
| BB2442-SiaQ       | 1-163           |
| Asuc_0158-SiaQ    | 1-163           |
| Bpro_1871-SiaQ    | 1-164           |
| NAS141_03721-SiaQ | 1-164           |
| RD1_1052-SiaQ     | 1-164           |
| HICG_00826-SiaQ   | 1-165           |
| Rfer_1840-SiaQ    | 1-165           |
| Dde_0634-SiaQ     | 1-165           |
| Desal_0342-SiaQ   | 1-165           |
| BB3421-SiaQ       | 1-166           |
| NAS141_03681-SiaQ | 1-169           |
| Csal_0660-SiaQ    | 1-169           |
| pro_4736-SiaQ     | 1-172           |
| SM_b20295-SiaQ    | 1-172           |
| Desal_2161-SiaQ   | 1-172           |
| Smed_3836-SiaQ    | 1-172           |
| CPS_0129-SiaQ     | 1-173           |
| Oant_3902-SiaQ    | 1-173           |
| BB0719-SiaQ       | 1-174           |
| Dde_1548-SiaQ     | 1-174           |
| RD1_3994-SiaQ     | 1-175           |
| Csal_2479-SiaQ    | 1-177           |
| Veis_3954-SiaQ    | 1-178           |
| RD1_0742-SiaQ     | 1-180           |
| Oant_4429-SiaQ    | 1-180           |
| BBta_0128-SiaQ    | 1-181           |
| Apri_1383-SiaQ    | 1-183           |
| MIM_c39430-SiaQ   | 1-185           |

|                   |                 |
|-------------------|-----------------|
| RPB_3329-SiaQ     | 1-186           |
| Xaut_3368-SiaQ    | 1-187           |
| Sdel_0447-SiaQ    | 1-187           |
| Bpro_0088-SiaQ    | 1-188           |
| SM_b20442-SiaQ    | 1-190           |
| Atu3253-SiaQ      | 1-190           |
| bll6834-SiaQ      | 1-192           |
| SPO1773-SiaQ      | 1-192           |
| Bamb_6123-SiaQ    | 1-192           |
| Csal_0678-SiaQ    | 1-198           |
| H16_A1328-SiaQ    | 1-200           |
| RPB_2686-SiaQ     | 1-201           |
| Shew_1446-SiaQ    | 1-212           |
| SO_3134-SiaQ      | 1-219           |
| <b>M-domain</b>   | <b>residues</b> |
| SPO1773-SiaM      | 1-419           |
| HICG_00826-SiaM   | 1-423           |
| Oant_3902-SiaM    | 1-424           |
| Bpro_1871-SiaM    | 1-425           |
| Veis_3954-SiaM    | 1-425           |
| BB3421-SiaM       | 1-425           |
| Desal_2161-SiaM   | 1-425           |
| Oant_4429-SiaM    | 1-425           |
| RD1_1052-SiaM     | 1-425           |
| Xaut_3368-SiaM    | 1-426           |
| CPS_0129-SiaM     | 1-426           |
| RPB_2686-SiaM     | 1-426           |
| MIM_c39430-SiaM   | 1-426           |
| Desal_0342-SiaM   | 1-426           |
| NAS141_03681-SiaM | 1-426           |
| Smed_3836-SiaM    | 1-426           |
| SM_b20295-SiaM    | 1-426           |
| Csal_0660-SiaM    | 1-426           |
| Csal_2479-SiaM    | 1-426           |
| RD1_3994-SiaM     | 1-427           |

|                   |       |
|-------------------|-------|
| Dde_1548-SiaM     | 1-427 |
| Sdel_0447-SiaM    | 1-427 |
| FN1258-SiaM       | 1-428 |
| Bpro_3107-SiaM    | 1-429 |
| Asuc_0158-SiaM    | 1-430 |
| BB0719-SiaM       | 1-430 |
| BB2442-SiaM       | 1-430 |
| BBta_0128-SiaM    | 1-430 |
| RPB_3329-SiaM     | 1-430 |
| RD1_0742-SiaM     | 1-431 |
| Dde_0634-SiaM     | 1-433 |
| Appe_1383-SiaM    | 1-433 |
| H16-A1328-SiaM    | 1-434 |
| Clobol_03198-SiaM | 1-435 |
| NAS141_03721-SiaM | 1-436 |
| Csal_0678-SiaM    | 1-440 |
| Bpro_4736-SiaM    | 1-440 |
| Bpro_0088-SiaM    | 1-446 |
| Atu3253-SiaM      | 1-447 |
| Rfer_1840-SiaM    | 1-449 |
| Bamb_6123-SiaM    | 1-450 |
| EFER_1530-SiaM    | 1-452 |
| Shew_1446-SiaM    | 1-465 |
| SO_3134-SiaM      | 1-465 |
| bll6834-SiaM      | 1-468 |
| SM_b20442-SiaM    | 1-468 |

### Supplementary References

1. Punjani, A., Rubinstein, J. L., Fleet, D. J. & Brubaker, M. A. cryoSPARC: algorithms for rapid unsupervised cryo-EM structure determination. *Nat Methods* **14**, 290-296 (2017).
2. Scheres, S. H. W. RELION: implementation of a Bayesian approach to cryo-EM structure determination. *Journal of structural biology* **180**, 519-530 (2012).
3. Ovchinnikov, S., Kamisetty, H. & Baker, D. Robust and accurate prediction of residue-residue interactions across protein interfaces using evolutionary information. *eLife* **3**, 1061-1021 (2014).
4. Jumper, J. et al. Highly accurate protein structure prediction with AlphaFold. *Nature* **596**, 583-589 (2021).
5. Chowdhury, N. et al. The VC1777–VC1779 proteins are members of a sialic acid-specific subfamily of TRAP transporters (SiaPQM) and constitute the sole route of sialic acid uptake in the human pathogen *Vibrio cholerae*. *Microbiology* **158**, 2158-2167 (2012).
6. Vetting, M. W. et al. Experimental strategies for functional annotation and metabolism discovery: targeted screening of solute binding proteins and unbiased panning of metabolomes. *Biochemistry* **54**, 909-931 (2015).
7. Sievers, F. & Higgins, D. G. in *Multiple sequence alignment methods* 105-116 (Springer, 2014).
8. Waterhouse, A. M., Procter, J. B., Martin, D. M. A., Clamp, M. & Barton, G. J. Jalview Version 2—a multiple sequence alignment editor and analysis workbench. *Bioinformatics* **25**, 1189-1191 (2009).
9. Schneider, T. D. & Stephens, R. M. Sequence logos: a new way to display consensus sequences. *Nucleic Acids Res* **18**, 6097-6100 (1990).
10. Crooks, G. E., Hon, G., Chandonia, J.-M. & Brenner, S. E. WebLogo: a sequence logo generator. *Genome research* **14**, 1188-1190 (2004).
11. Williams, C. J. et al. MolProbity: More and better reference data for improved all-atom structure validation. *Protein Science* **27**, 293-315 (2018).
